# Supplementary material for: Nutritional and ecological perspectives of the interrelationships between diet and the gut microbiome in multiple sclerosis: Insights from marmosets
Source: PubMed Central journal article supplement — iScience. 2021 Jun 10;24(7):102709. doi: 10.1016/j.isci.2021.102709 (PMC8282968; doi:10.1016/j.isci.2021.102709), 2021-06-10
Supplement: mmc1.pdf [file mmc1.pdf]

iScience, Volume 24

## **Supplemental information**

### **Nutritional and ecological perspectives of the interrelationships between diet and the gut microbiome in multiple sclerosis: Insights from marmosets**

**Maria Elisa Perez-Muñoz, Scott Sugden, Hermie J.M. Harmsen, Bert A. 't Hart, Jon D. Laman, and Jens Walter**

## SUPPLEMENTARY INFORMATION

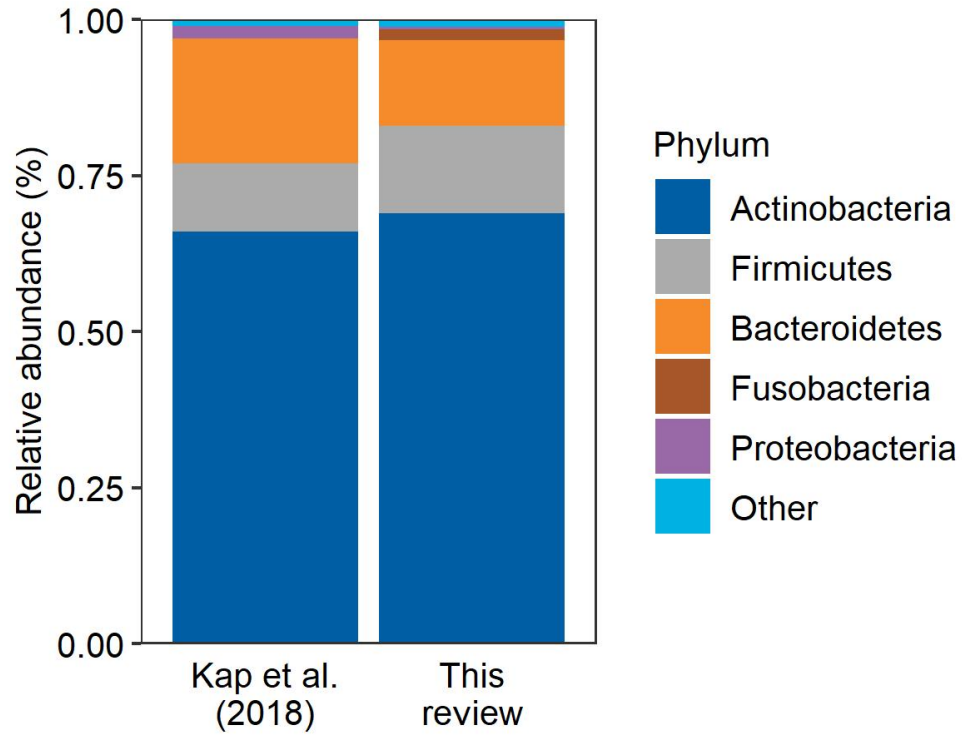

**Figure S1. Differences in taxa found between analyses.** Diagram compares taxa reported by Kap et al. (2018) with the reanalysis presented in this review. Bar graphs represent phylum abundances.

**Table S1. Gut microbiome composition of healthy marmosets (related to Supplementary Figure S1).** Table shows mean and standard deviation, minimum, maximum, and median relative abundances for each taxon across all marmoset samples taken at day -56 and day -7, prior to disease induction. Below the phylum level, only taxa with a mean relative abundance >1% are shown. Percentages next to OTU names indicate percentage sequence identity with that species.

| Taxonomic Level | Taxon                                              | Mean (%) | Standard deviation | Min (%) | Max (%) | Median (%) |
|-----------------|----------------------------------------------------|----------|--------------------|---------|---------|------------|
| Phylum          | Actinobacteria                                     | 69.06    | 17.31              | 2.30    | 92.17   | 72.15      |
| Phylum          | Bacteroidetes                                      | 13.98    | 9.81               | 1.18    | 35.36   | 10.56      |
| Phylum          | Firmicutes                                         | 13.65    | 5.44               | 4.67    | 23.37   | 13.04      |
| Phylum          | Fusobacteria                                       | 1.81     | 10.20              | 0       | 57.71   | 0          |
| Phylum          | Proteobacteria                                     | 1.09     | 1.00               | 0.05    | 4.33    | 0.76       |
| Phylum          | Tenericutes                                        | 0.01     | 0.01               | 0       | 0.04    | 0          |
| Family          | Bifidobacteriaceae                                 | 63.20    | 16.39              | 1.63    | 87.15   | 67.17      |
| Family          | Lachnospiraceae                                    | 7.67     | 4.30               | 1.04    | 16.42   | 6.89       |
| Family          | Coriobacteriaceae                                  | 5.92     | 3.01               | 0.65    | 12.71   | 5.33       |
| Family          | Bacteroidaceae                                     | 5.32     | 6.48               | 0.04    | 32.83   | 3.17       |
| Family          | Prevotellaceae                                     | 5.30     | 3.65               | 0.12    | 12.40   | 5.42       |
| Family          | Veillonellaceae                                    | 4.46     | 3.64               | 0.61    | 19.04   | 3.41       |
| Family          | Uncl. Bacteroidales                                | 2.46     | 2.88               | 0.03    | 13.92   | 1.55       |
| Family          | Fusobacteriaceae                                   | 1.83     | 10.28              | 0       | 58.17   | 0          |
| Family          | Acidaminococcaceae                                 | 1.04     | 0.69               | 0.19    | 3.27    | 0.86       |
| Genus           | <i>Bifidobacterium</i>                             | 63.06    | 16.36              | 1.47    | 86.96   | 67.09      |
| Genus           | <i>Bacteroides</i>                                 | 5.32     | 6.49               | 0.04    | 32.85   | 3.18       |
| Genus           | <i>Megamonas</i>                                   | 2.21     | 1.45               | 0.26    | 6.16    | 2.24       |
| Genus           | <i>Megasphaera</i>                                 | 2.09     | 2.51               | 0.20    | 14.14   | 1.56       |
| Genus           | <i>Fusobacterium</i>                               | 1.83     | 10.29              | 0       | 58.21   | 0          |
| OTU             | OTU1 <i>Bifidobacterium callitrichos</i> (100%)    | 42.63    | 13.97              | 0.34    | 68.79   | 41.96      |
| OTU             | OTU2 <i>Bifidobacterium aesculapii</i> (100%)      | 8.18     | 7.24               | 0.12    | 33.99   | 5.81       |
| OTU             | OTU5 <i>Bacteroides</i> sp. (93.4%)                | 4.32     | 4.14               | 0.04    | 13.83   | 2.69       |
| OTU             | OTU3 <i>Parolsenella catena</i> (96.59%)           | 3.87     | 2.74               | 0.48    | 9.44    | 2.94       |
| OTU             | OTU7 <i>Prevotella</i> sp. (83.73%)                | 3.65     | 3.13               | 0       | 11.27   | 2.89       |
| OTU             | OTU4 <i>Bifidobacterium dentium</i> (97.34%)       | 3.12     | 4.62               | 0       | 19.86   | 0.90       |
| OTU             | OTU9 <i>Lachnospiraceae</i> sp. (95.79%)           | 2.84     | 2.01               | 0.03    | 7.86    | 2.30       |
| OTU             | OTU8 <i>Lachnospiraceae</i> sp. (96.29%)           | 2.77     | 1.74               | 0.23    | 6.92    | 2.68       |
| OTU             | OTU6 <i>Bifidobacterium reuteri</i> (98.54%)       | 2.46     | 1.34               | 0.03    | 5.34    | 2.41       |
| OTU             | OTU23 <i>Bifidobacterium hapali</i> (96.76%)       | 2.20     | 1.97               | 0.33    | 8.77    | 1.66       |
| OTU             | OTU12 <i>Fusobacterium varium</i> (100%)           | 1.87     | 10.53              | 0       | 59.56   | 0          |
| OTU             | OTU10 <i>Bacteroides salanitronis</i> (91.27%)     | 1.81     | 2.67               | 0       | 13.19   | 1.01       |
| OTU             | OTU50 <i>Bifidobacterium callimiconis</i> (98.04%) | 1.65     | 3.75               | 0       | 18.58   | 0.12       |

|     |                                                           |      |      |      |      |      |
|-----|-----------------------------------------------------------|------|------|------|------|------|
| OTU | OTU73 <i>Bifidobacterium tissierii</i> (99.27%)           | 1.37 | 1.70 | 0    | 8.84 | 0.73 |
| OTU | OTU13 <i>Lachnospiraceae</i> sp. (95.3%)                  | 1.17 | 1.07 | 0    | 4.44 | 0.81 |
| OTU | OTU24 <i>Megamonas</i> sp. (97.9%)                        | 1.06 | 0.99 | 0.01 | 4.56 | 0.79 |
| OTU | OTU20 <i>Phascolarctobacterium succinatutens</i> (92.31%) | 1.04 | 0.70 | 0.19 | 3.28 | 0.86 |

**Table S2. Coefficients and 95% confidence intervals for mixed-effects models predicting diversity metrics (related to Figure 1).** Coefficients were considered significant (\*) if the 95% confidence interval did not overlap zero. Variables with no coefficient shown for a given diversity metric were not present in top-ranked models ( $\Delta AIC_c < 2$ ) predicting that metric. Positive and negative coefficients indicate YBS and WBS, respectively, for diet; symptomatic and healthy marmosets, respectively, for pathology; and increases and decreases over the course of the experiment, respectively, for time.

| Measure                   | Diet     |        |          | Pathology |        |          | Time     |        |          |
|---------------------------|----------|--------|----------|-----------|--------|----------|----------|--------|----------|
|                           | Lower CI | Coef   | Upper CI | Lower CI  | Coef   | Upper CI | Lower CI | Coef   | Upper CI |
| Bray-Curtis dissimilarity | -1.211   | -0.808 | -0.405 * |           |        |          | 0.159    | 0.340  | 0.520 *  |
| Simpson diversity         | -0.713   | -0.095 | 0.185    |           |        |          | 0.135    | 0.326  | 0.518 *  |
| Pielou evenness           | -0.631   | -0.042 | 0.265    | -0.469    | 0.064  | 1.055    | 0.105    | 0.322  | 0.538 *  |
| Species richness          | -0.878   | -0.045 | 0.365    | -0.887    | -0.049 | 0.355    | -0.301   | -0.024 | 0.088    |

**Table S3. Gut microbiome composition at different time points of marmosets fed the WBS and YBS diets (related to Figures 2 and 3).** Table shows mean and standard deviations of relative abundances for each diet treatment and for each taxon across all marmoset samples taken at each experimental time point. Below the phylum level, only taxa with a mean relative abundance >1% are shown. Percentages next to OTU names indicate percentage sequence identity with that species. WBS, water-based supplement; YBS, yogurt-based supplement; SD, standard deviation

| Taxonomic Level             | Taxon                                      | WBS (% Mean ± SD) |               |               |               | YBS (% Mean ± SD) |               |              |               |
|-----------------------------|--------------------------------------------|-------------------|---------------|---------------|---------------|-------------------|---------------|--------------|---------------|
|                             |                                            | -56               | -7            | 21            | 49            | -56               | -7            | 21           | 49            |
| Phylum                      | Actinobacteria                             | 63.34±13.66       | 68.22 ± 27.42 | 59.61 ± 13.35 | 56.44 ± 18.44 | 67.56 ± 12.84     | 76.90 ± 10.50 | 73.11 ± 7.84 | 67.91 ± 12.03 |
|                             | Bacteroidetes                              | 17.59 ± 11.58     | 13.48 ± 9.34  | 24.71 ± 14.92 | 25.72 ± 19.41 | 13.62 ± 10.03     | 11.23 ± 8.89  | 13.61 ± 6.68 | 15.62 ± 8.53  |
|                             | Firmicutes                                 | 16.89 ± 3.45      | 10.38 ± 5.76  | 13.71 ± 5.92  | 14.73 ± 5.36  | 16.79 ± 5.12      | 10.53 ± 3.60  | 11.48 ± 4.37 | 14.77 ± 3.55  |
|                             | Proteobacteria                             | 1.19 ± 0.73       | 0.57 ± 0.71   | 1.62 ± 0.88   | 2.29 ± 3.28   | 1.33 ± 0.89       | 1.03 ± 0.61   | 0.83 ± 0.47  | 1.26 ± 0.88   |
|                             | Tenericutes                                | 0.02 ± 0.01       | 0.01 ± 0.00   | 0.02 ± 0.03   | 0.07 ± 0.08   | 0.01 ± 0.01       | 0.01 ± 0.00   | 0.08 ± 0.15  | 0.19 ± 0.42   |
| Family                      | Acidaminococcaceae                         | 1.26 ± 0.68       | 0.54 ± 0.22   | 0.97 ± 0.39   | 1.06 ± 0.93   | 1.33 ± 0.89       | 1.03 ± 0.61   | 0.83 ± 0.47  | 1.26 ± 0.88   |
|                             | Anaeroplasmataceae                         | 0.02 ± 0.01       | 0.01 ± 0.00   | 0.02 ± 0.03   | 0.06 ± 0.08   | 0.01 ± 0.01       | 0.01 ± 0.00   | 0.08 ± 0.15  | 0.19 ± 0.42   |
|                             | Bifidobacteriaceae                         | 58.24 ± 13.29     | 62.48 ± 25.34 | 54.89 ± 13.13 | 49.67 ± 20.68 | 62.74 ± 12.57     | 68.03 ± 12.12 | 66.75 ± 8.61 | 63.49 ± 12.21 |
|                             | Coriobacteriaceae                          | 4.85 ± 1.68       | 5.51 ± 2.90   | 4.53 ± 1.99   | 6.56 ± 3.17   | 4.58 ± 3.41       | 8.62 ± 2.24   | 6.14 ± 2.47  | 4.18 ± 2.16   |
|                             | Enterobacteriaceae                         | 0.01 ± 0.00       | 0.01 ± 0.00   | 0.01 ± 0.00   | 1.24 ± 3.39   | 0.02 ± 0.02       | 0.01 ± 0.00   | 0.01 ± 0.01  | 0.02 ± 0.03   |
|                             | Lachnospiraceae                            | 11.17 ± 3.48      | 4.46 ± 2.36   | 3.66 ± 1.65   | 9.29 ± 3.98   | 9.99 ± 4.20       | 4.89 ± 2.17   | 3.98 ± 2.61  | 6.99 ± 3.06   |
|                             | Porphyromonadaceae                         | 1.04 ± 0.91       | 0.82 ± 0.88   | 1.68 ± 1.84   | 4.39 ± 5.76   | 0.36 ± 0.68       | 0.93 ± 1.09   | 0.81 ± 0.92  | 1.90 ± 2.56   |
|                             | Prevotellaceae                             | 6.20 ± 3.13       | 5.07 ± 3.91   | 9.88 ± 4.88   | 6.38 ± 6.01   | 4.32 ± 3.46       | 5.52 ± 4.37   | 7.19 ± 5.80  | 6.77 ± 6.28   |
|                             | Sutterellaceae                             | 0.76 ± 0.65       | 0.27 ± 0.30   | 0.40 ± 0.34   | 0.32 ± 0.23   | 0.97 ± 0.73       | 0.30 ± 0.39   | 0.31 ± 0.23  | 0.67 ± 0.79   |
|                             | Veillonellaceae                            | 3.71 ± 3.37       | 4.93 ± 5.81   | 8.54 ± 7.53   | 3.50 ± 1.98   | 4.85 ± 2.37       | 4.29 ± 2.52   | 6.40 ± 3.87  | 6.03 ± 3.43   |
| Genus                       | Asteroleplasma                             | 0.02 ± 0.01       | 0.01 ± 0.00   | 0.02 ± 0.03   | 0.06 ± 0.08   | 0.01 ± 0.01       | 0.01 ± 0.00   | 0.08 ± 0.15  | 0.19 ± 0.42   |
|                             | Bifidobacterium                            | 57.88 ± 13.24     | 61.95 ± 25.19 | 54.39 ± 13.14 | 49.19 ± 20.49 | 62.38 ± 12.51     | 67.55 ± 12.06 | 66.21 ± 8.58 | 62.98 ± 12.13 |
|                             | Megasphaera                                | 1.53 ± 1.44       | 3.16 ± 4.44   | 3.56 ± 3.04   | 1.91 ± 1.32   | 1.95 ± 1.22       | 1.67 ± 1.45   | 3.69 ± 2.19  | 3.63 ± 2.35   |
|                             | Phascolarctobacterium                      | 0.71 ± 0.36       | 0.33 ± 0.17   | 0.55 ± 0.23   | 0.58 ± 0.50   | 0.68 ± 0.49       | 0.59 ± 0.34   | 0.45 ± 0.28  | 0.67 ± 0.47   |
|                             | Succinatimonas                             | 0.02 ± 0.02       | 0.16 ± 0.32   | 0.24 ± 0.29   | 0.15 ± 0.24   | 0.01 ± 0.00       | 0.01 ± 0.00   | 0.01 ± 0.00  | 0.01 ± 0.00   |
|                             | Sutterella                                 | 0.76 ± 0.64       | 0.26 ± 0.29   | 0.40 ± 0.34   | 0.32 ± 0.23   | 0.97 ± 0.73       | 0.30 ± 0.39   | 0.30 ± 0.23  | 0.66 ± 0.79   |
| OTU#                        | 2 <i>Bifidobacterium aesculapii</i> (100%) | 7.72 ± 4.10       | 11.57 ± 10.58 | 5.53 ± 3.71   | 5.98 ± 4.14   | 3.78 ± 2.70       | 9.12 ± 7.23   | 3.05 ± 2.72  | 8.95 ± 10.33  |
|                             | 3 <i>Parolsenella catena</i> (96.59%)      | 2.23 ± 1.02       | 3.77 ± 2.31   | 2.92 ± 1.69   | 2.98 ± 2.32   | 2.17 ± 2.06       | 7.09 ± 1.81   | 4.80 ± 2.35  | 1.50 ± 1.02   |
|                             | 4 <i>Bifidobacterium dentium</i> (97.34%)  | 1.27 ± 1.74       | 1.95 ± 2.69   | 6.91 ± 7.91   | 3.72 ± 6.86   | 3.46 ± 4.74       | 5.64 ± 6.80   | 14.04 ± 8.93 | 6.30 ± 3.40   |
|                             | 7 <i>Prevotella</i> (83.73%)               | 4.01 ± 2.07       | 3.89 ± 3.74   | 7.88 ± 5.06   | 4.68 ± 5.30   | 2.52 ± 2.62       | 3.98 ± 3.87   | 5.08 ± 4.81  | 4.92 ± 5.75   |
|                             | 13 Lachnospiraceae (95.30%)                | 2.08 ± 0.94       | 0.54 ± 0.34   | 0.40 ± 0.28   | 1.72 ± 1.59   | 1.52 ± 1.29       | 0.49 ± 0.43   | 0.36 ± 0.30  | 0.45 ± 0.36   |
| 14 Lachnospiraceae (96.31%) | 0.65 ± 0.29                                | 0.54 ± 0.69       | 0.47 ± 0.41   | 1.84 ± 2.31   | 0.91 ± 0.97   | 0.57 ± 0.79       | 0.48 ± 0.51   | 1.83 ± 1.42  |               |

|     |                                                     |             |             |             |             |             |             |             |             |
|-----|-----------------------------------------------------|-------------|-------------|-------------|-------------|-------------|-------------|-------------|-------------|
| 15  | <i>Megasphaera paucivorans</i> (95.57%)             | 0.59 ± 0.66 | 1.12 ± 1.66 | 1.08 ± 1.13 | 0.52 ± 0.35 | 0.72 ± 0.59 | 0.54 ± 0.43 | 1.12 ± 0.88 | 1.06 ± 0.88 |
| 20  | <i>Phascolarctobacterium succinatutens</i> (92.31%) | 1.26 ± 0.68 | 0.53 ± 0.22 | 0.97 ± 0.38 | 1.04 ± 0.92 | 1.31 ± 0.89 | 1.03 ± 0.60 | 0.82 ± 0.47 | 1.25 ± 0.88 |
| 24  | <i>Megamonas</i> (97.90%)                           | 1.24 ± 1.35 | 0.46 ± 0.50 | 1.44 ± 0.73 | 0.38 ± 0.47 | 1.28 ± 1.02 | 1.23 ± 0.73 | 0.85 ± 0.68 | 0.62 ± 0.45 |
| 28  | <i>Parabacteroides</i> (96.23%)                     | 0.06 ± 0.07 | 0.44 ± 0.65 | 0.86 ± 1.13 | 0.54 ± 1.19 | 0.04 ± 0.09 | 0.27 ± 0.34 | 0.36 ± 0.45 | 0.52 ± 1.11 |
| 32  | <i>Parolsenella</i> (96.83%)                        | 0.29 ± 0.18 | 0.13 ± 0.14 | 0.14 ± 0.09 | 0.12 ± 0.17 | 0.20 ± 0.25 | 0.32 ± 0.19 | 0.31 ± 0.29 | 0.08 ± 0.07 |
| 35  | <i>Bifidobacterium moukalabense</i> (96.82%)        | 0.25 ± 0.23 | 0.17 ± 0.17 | 0.11 ± 0.12 | 0.29 ± 0.29 | 0.22 ± 0.20 | 0.21 ± 0.16 | 0.12 ± 0.12 | 0.39 ± 0.53 |
| 37  | Muribaculaceae (87.94%)                             | 0.11 ± 0.11 | 0.04 ± 0.04 | 0.05 ± 0.05 | 0.66 ± 0.82 | 0.06 ± 0.04 | 0.01 ± 0.01 | 0.07 ± 0.04 | 0.52 ± 1.09 |
| 38  | <i>Parolsenella</i> (97.32%)                        | 0.17 ± 0.23 | 0.06 ± 0.09 | 0.04 ± 0.07 | 0.13 ± 0.33 | 0.46 ± 0.32 | 0.08 ± 0.15 | 0.06 ± 0.10 | 0.20 ± 0.24 |
| 40  | <i>Bifidobacterium goeldii</i> (98.29%)             | 0.38 ± 0.49 | 0.36 ± 0.38 | 0.20 ± 0.20 | 0.34 ± 0.32 | 0.26 ± 0.21 | 0.21 ± 0.21 | 0.24 ± 0.28 | 0.82 ± 1.21 |
| 42  | <i>Enterobacter hormaechei</i> (100%)               | 0.01 ± 0.00 | 0.01 ± 0.00 | 0.01 ± 0.00 | 1.21 ± 3.35 | 0.01 ± 0.00 | 0.01 ± 0.00 | 0.01 ± 0.01 | 0.02 ± 0.03 |
| 45  | <i>Streptococcus</i> (97.90%)                       | 0.22 ± 0.21 | 0.17 ± 0.27 | 0.18 ± 0.24 | 0.08 ± 0.13 | 0.10 ± 0.14 | 0.14 ± 0.10 | 0.10 ± 0.12 | 0.04 ± 0.06 |
| 47  | <i>Succinatimonas hippei</i> (96.10%)               | 0.02 ± 0.02 | 0.16 ± 0.32 | 0.24 ± 0.29 | 0.15 ± 0.24 | 0.01 ± 0.00 | 0.01 ± 0.00 | 0.01 ± 0.00 | 0.01 ± 0.00 |
| 56  | Anaeroplasmataceae (95.31%)                         | 0.02 ± 0.01 | 0.01 ± 0.00 | 0.02 ± 0.03 | 0.06 ± 0.08 | 0.01 ± 0.01 | 0.01 ± 0.00 | 0.08 ± 0.15 | 0.20 ± 0.44 |
| 58  | <i>Bifidobacterium catulorum</i> (100%)             | 0.02 ± 0.02 | 0.09 ± 0.18 | 0.02 ± 0.02 | 0.04 ± 0.06 | 0.01 ± 0.01 | 0.01 ± 0.01 | 0.05 ± 0.06 | 0.15 ± 0.24 |
| 59  | <i>Kineothrix</i> (97.03%)                          | 0.04 ± 0.06 | 0.03 ± 0.05 | 0.03 ± 0.04 | 0.26 ± 0.51 | 0.01 ± 0.00 | 0.01 ± 0.00 | 0.01 ± 0.00 | 0.01 ± 0.00 |
| 72  | <i>Parolsenella catena</i> (96.10%)                 | 0.89 ± 0.50 | 0.60 ± 0.37 | 0.55 ± 0.44 | 1.31 ± 1.34 | 0.97 ± 0.59 | 0.41 ± 0.40 | 0.47 ± 0.49 | 1.44 ± 1.89 |
| 73  | <i>Bifidobacterium tissierii</i> (99.27%)           | 0.80 ± 0.55 | 1.90 ± 3.13 | 1.17 ± 1.12 | 3.60 ± 2.77 | 1.55 ± 0.87 | 1.17 ± 0.80 | 1.31 ± 0.53 | 3.35 ± 2.35 |
| 129 | <i>Bifidobacterium hapali</i> (97.32%)              | 0.55 ± 0.67 | 0.09 ± 0.11 | 0.08 ± 0.11 | 0.31 ± 0.41 | 0.48 ± 0.44 | 0.70 ± 0.65 | 0.18 ± 0.13 | 0.52 ± 0.45 |
| 136 | <i>Megamonas</i> (96.97%)                           | 0.28 ± 0.21 | 0.19 ± 0.26 | 0.53 ± 0.65 | 0.29 ± 0.42 | 0.08 ± 0.08 | 0.68 ± 0.67 | 0.34 ± 0.32 | 0.17 ± 0.25 |
| 145 | <i>Bifidobacterium avesanii</i> (97.80%)            | 0.09 ± 0.11 | 0.09 ± 0.15 | 0.29 ± 0.53 | 0.06 ± 0.08 | 0.15 ± 0.16 | 0.19 ± 0.21 | 0.47 ± 0.49 | 0.24 ± 0.24 |
