# Supplementary material for: Nutritional and ecological perspectives of the interrelationships between diet and the gut microbiome in multiple sclerosis: Insights from marmosets
Source: PubMed Central journal article supplement — iScience. 2021 Jun 10;24(7):102709. doi: 10.1016/j.isci.2021.102709 (PMC8282968; doi:10.1016/j.isci.2021.102709), 2021-06-10
Supplement: mmc4.pdf [file mmc4.pdf]

## 1 **Methods**

### 2 **KEY RESOURCES TABLE**

| REAGENT or RESOURCE                                                                      | SOURCE           | IDENTIFIER                                                                                |
|------------------------------------------------------------------------------------------|------------------|-------------------------------------------------------------------------------------------|
| Deposited data                                                                           |                  |                                                                                           |
| NCBI Short Read Archive: raw sequencing data from all samples, including sample metadata | Kap et al., 2018 | PRJAN693190                                                                               |
| Software and algorithms                                                                  |                  |                                                                                           |
| R code required to reproduce all analyses                                                | This paper       | <a href="https://github.com/sasugden/marmosets">https://github.com/sasugden/marmosets</a> |

3

### 4 **Resource Availability**

#### 5 *Lead contact*

6 All inquiries and requests for further information should be directed to and will be fulfilled  
7 by the Lead Contact, Jens Walter, [jenswalter@ucc.ie](mailto:jenswalter@ucc.ie).

8

#### 9 *Materials availability*

10 This study did not generate any new specimens or materials.

11

#### 12 *Data and code availability*

13 The raw sequencing data obtained by Kap et al. has been deposited under the NCBI  
14 BioProject accession PRJAN693190. The R code required to reproduce all analyses is  
15 available from <https://github.com/sasugden/marmosets>.

16

### 17 **Experimental Model and Subject Details**

18 This study is based exclusively on publicly available data generated by Kap et al. (2018).

19 All experiments were conducted on eight adult dizygotic bone marrow-chimeric common  
20 marmoset (*Callithrix jacchus*) twin pairs of equal gender that were housed at the

21 Biomedical Primate Research Centre (Rijswijk, the Netherlands). Full details on animal  
22 models, husbandry, and care are available in the original manuscript.

23

## 24 **Method Details**

25 In Kap et al.'s experiment, one sibling from each of the marmoset twin pairs was reverted  
26 to the WBS diet, while the other sibling was kept on the YBS diet for the duration of the  
27 experiment. EAE was induced via injection of rhMOG into the dorsal skin eight weeks after  
28 the dietary change. Marmosets were euthanized within three days of developing an EAE  
29 score of 2.5 (paresis of one or more limbs) or at the predetermined end day of the study  
30 (120 days after immunization) if they did not reach that EAE score. Microbiome samples  
31 were collected at four separate time points, which we identified using the same titles at  
32 Kap et al.(2018): day -56 refers to the baseline (time point before diet change, 56 days  
33 before EAE induction), day -7 refers to animals seven weeks after the diet change (or one  
34 week before EAE induction), and day 21 and day 49 refer to three and seven weeks after  
35 disease induction, respectively.

36

## 37 **Quantification and Statistical Analysis**

### 38 *16S rRNA gene sequence processing*

39 Although Kap et al. used the PANDAseq QIIME pipeline for read processing, we chose to  
40 use a previously established pipeline in our lab (Deehan et al., 2020; Nguyen et al., 2020;  
41 Patry et al., 2019) that uses a combination of publicly available tools. This decision was  
42 made in recognition of the fact that there is no single best bioinformatics pipeline. Our goal

43 was to mirror the natural variation in results associated with different bioinformatics  
44 approaches as a way of getting a different perspective of the data.

45  
46 In our pipeline, raw paired-end reads provided by Kap et al.(2018) were trimmed to 250  
47 bases using the FASTX-toolkit ([hannonlab.cshl.edu/fastx\\_toolkit/index.html](http://hannonlab.cshl.edu/fastx_toolkit/index.html)). Reads were  
48 quality-filtered and paired using the merge-illumina-pairs application from Illumina utils  
49 (Eren et al., 2013). Sequences that did not meet the quality criteria (p-value of 0.03 or  
50 three or fewer mismatches in the overlapped region, enforced Q30 check, perfect  
51 matching to primers, and no ambiguous nucleotides) were discarded. If data for a later  
52 time point was missing (as in the case of marmosets that met endpoint criteria before day  
53 49), data obtained from the samples collected at necropsy was carried forward.

54  
55 After trimming and quality filtering, we obtained a total of 4,315,807 paired sequences  
56 (average  $55,331 \pm 12,922$ ; minimum=16,413; maximum=83,126). Files were subsampled  
57 to 16,000 sequences based on the sample with the lowest number of reads. Usearch v.10  
58 (Edgar, 2013) was used to compile and dereplicate sequences, discard singletons,  
59 remove chimeras, cluster OTUs at 98% identity, identify representative sequences for  
60 OTUs, and generate a final OTU table. Non-chimeric sequences were binned by  
61 sample/subject and submitted to the Ribosomal Database Project Classifier (Wang et al.,  
62 2007) for taxonomic assignment from phyla to genera. OTUs were assigned a species  
63 identity by submitting representative sequences to the Silva ACT database (Quast et al.,  
64 2013), and taxonomic assignments confirmed using NCBI blastn (Altschul et al., 1990),

65 EZ biocloud (Yoon et al., 2017), and Ribosomal Database Project Seqmatch (Michigan  
66 State University, 2016).

67  
68 OTU tables were imported into R 3.6.3 (R Core Team, 2018) for statistical analyses. Raw  
69 sequence counts were transformed to relative abundance in percent, and, with the  
70 exception of the yogurt species *Lactobacillus delbrueckii*, taxa with a mean relative  
71 abundance of  $\leq 0.10\%$  in the entire dataset were removed. All downstream analyses were  
72 performed in the R statistical environment.

73  
74 *Mixed-effect models and diversity analyses*

75 We used a combination of mixed-effect models and ordination analyses to test for  
76 significant differences in alpha- and beta-diversity between treatment groups and among  
77 time points. Alpha diversity measures, including species richness, Simpson's diversity,  
78 and Pielou's evenness, were calculated using the package *phyloseq* (McMurdie and  
79 Holmes, 2013), and a Bray-Curtis distance matrix was generated using the package  
80 *vegan* (Oksanen et al., 2019). We calculated inter-individual Bray-Curtis distances at each  
81 time point as the average distance from each sample to every other sample taken at that  
82 same time point and intra-individual Bray-Curtis distances as the average distance among  
83 all samples from the same individual.

84  
85 We then used linear mixed-effect models implemented in the package *lme4* (Bates et al.,  
86 2015) to determine whether diet or the development of pathology affected microbiome  
87 diversity. For each diversity measure, we designed models predicting diversity as a

88 function of diet (WBS or YBS), pathology (diseased or healthy), and time point (to account  
89 for the fact that pathology was only observed at the fourth time point). We originally tested  
90 models that included interactions between diet and pathology and between diet and time,  
91 but few of these interactions were significant and, due to the small sample size, including  
92 these terms often led to overfit or singular models, so we therefore proceeded with our  
93 three-predictor model structure. All models also included a random intercept term for  
94 subject nested within twin pair to account for the repeated-measures nature of the study  
95 and natural similarities among marmoset twins, as follows:

$$96 \quad \text{Diversity} = \text{Diet}_{(\text{WBS or YBS})} + \text{Time}_{(\text{day } -56, -21, 7, 49)} + \text{Pathology}_{(\text{yes or no})} + (1|\text{TwinPair/Subject})$$

97  
98 All response variables were mean-centered and standardized prior to model construction  
99 to facilitate comparisons across models. We fit models using maximum likelihood to  
100 enable among-model comparisons, and we identified the best predictors of diversity by  
101 evaluating all subsets of each model construction using the corrected Akaike's information  
102 criterion (AICc) and averaging predictor coefficients for all models with a  $\Delta\text{AICc} < 2$ . A  
103 variable was considered significant if the 95% confidence interval of its coefficient did not  
104 overlap zero.

105  
106 We tested for differences in overall community composition using a Bray-Curtis distance-  
107 based permutational multivariate analysis of variance (PERMANOVA) and the  
108 permutational test for multivariate dispersion (PERMDISP), and we visualized  
109 compositional differences using non-metric dimensional scaling (NMDS). These analyses  
110 were executed using the metaMDS, adonis and betadisper functions from the R package

111 *vegan* (Oksanen et al., 2019). To thoroughly investigate variation throughout the  
112 experiment, we compared communities between diets at each time point, within diets  
113 relative to the previous time point, and between healthy and symptomatic monkeys on  
114 each diet. We used the  $R^2$  value from each PERMANOVA comparison as a measure of  
115 the percentage of variation in community composition that was explained by each  
116 analysis, with larger  $R^2$  values indicating that a variable was a better indicator of group  
117 differences.

118  
119 To identify how individual taxa were related to diet or pathology, we repeated our mixed-  
120 effect model procedure (as described above) using  $\log_{10}$ -transformed taxon abundances  
121 as the response variables, as follows:

$$122 \quad \log_{10}(\text{relative abundance}) = \text{Diet}_{(\text{WBS or YBS})} + \text{Time}_{(\text{day } -56, -21, 7, 49)} + \text{Pathology}_{(\text{yes or no})} + (1|\text{TwinPair/Subject})$$

123 We also attempted to pinpoint specific taxonomic changes caused by diet and/or disease  
124 induction on the gut microbiome by calculating the  $\log_{10}$ -transformed changes in relative  
125 abundance between consecutive time points for each marmoset and running the same  
126 models using the absolute value of this “delta abundance” as a response variable, as  
127 follows:

$$128 \quad \log_{10}(|\text{delta abundance}|) = \text{Diet}_{(\text{WBS or YBS})} + \text{Time}_{(\text{day } -56, -21, 7, 49)} + \text{Pathology}_{(\text{yes or no})} + (1|\text{TwinPair/Subject})$$

129 Where  $\text{delta abundance} = (\text{relative abundance})_{t+1} - (\text{relative abundance})_t$  and  $t$  indicates the experimental  
130 time point. In this way, we tested for both (1) consistent microbial associations with diet  
131 and/or pathology throughout the entire experiment and (2) diet and/or pathology-related  
132 shifts in taxon abundances between experimental time points. In the manuscript, we only  
133 display results for taxa present at  $\geq 0.05\%$  relative abundance and for which the absolute  
134 values of predictor coefficients were  $\geq 0.5$ .

135  
136 All modeling procedures were supported by pairwise comparisons among marmoset  
137 groups separated by diet, time point, and the presence of pathology: we compared WBS-  
138 and YBS-fed monkeys at each time point, as well as diseased and healthy monkeys within  
139 each diet group at the fourth time point. We also tested between-time point comparisons  
140 within each diet group to isolate specific changes caused by the intervention between time  
141 points (day -56 to -7 for the effect of diet, day -7 to day 21 for the effect of disease  
142 induction, and day -7 to 49 for the effect of pathology). These pairwise comparisons were  
143 implemented for alpha-diversity data and both absolute and delta relative abundances.  
144 Alpha diversity data was tested using an ANOVA followed by Tukey's *post hoc* test, with  
145 pairwise comparisons restricted to only the comparisons of interest (described above).  
146 Species abundances were tested using Student's t-tests, with p-values corrected for  
147 multiple comparisons using the false discovery rate (FDR) correction. Statistical  
148 significance was defined at  $p < 0.05$  after the FDR correction.

149  
150 *Additional ecological effects*  
151 To determine how diet, pathology and other ecological variables (sibling pair, cage, time)  
152 affected overall community composition, or  $\beta$ -diversity, we used both unsupervised and  
153 supervised clustering approaches. In the supervised approach, we performed Bray-Curtis  
154 distance-based redundancy analysis (dbRDA) based on diet, pathology, time point, cage,  
155 sibling pair, and subject identity and used an ANOVA to identify which terms contributed  
156 significantly to community structure. Statistical significance was defined at  $p < 0.05$  for all  
157  $\beta$ -diversity analysis. We additionally determined which predictors had the strongest

158 explanatory power by examining the adjusted- $R^2$  values of separate dbRDA models in  
159 which each variable was the sole predictor, as well as using a forward selection procedure  
160 implemented with the ordi2step function in *vegan* (Oksanen et al., 2019). We evaluated  
161  $R^2$  values from the dbRDA using the same criteria as before.

162  
163 We also evaluated the importance of including sibling pair and individual identity as a  
164 nested random effect in our mixed-effect models (above) by comparing the conditional  
165 and marginal  $R^2$  values for each model. These values were calculated using the  
166 *r.squaredGLMM* function in the package *MuMIn*; we used the marginal  $R^2$  as an indicator  
167 of the variance explained by the fixed effects, and the difference between the conditional  
168 and marginal  $R^2$  as an indicator of the variance explained by random effects. Larger  $R^2$   
169 values indicated that a given component of the model, either the fixed effects (diet,  
170 pathology, and time) or random effects (sibling pair and individual identity), was a better  
171 predictor of taxon abundances.

172  
173 *Marmoset nutritional demands*  
174 To ensure that any diet-related health benefits of the YBS supplement were the result of  
175 any differences in overall nutrient provisioning, we additionally assessed whether both the  
176 YBS and WBS diets met all the nutritional requirements for moderately active marmosets.  
177 Notably, the YBS provided more total protein and calories than the WBS. Of the total  
178 weekly number of calories provided by each supplement, 18% came from protein in the  
179 YBS compared to only 15% in the WBS. With respect to energy requirements, the basal  
180 metabolic rate (BMR) and field metabolic rate (FMR) for non-pregnant marmosets (which

181 weigh approximately 250 g) with a moderately active lifestyle have been estimated to be  
182 around 25 kcal/d (102 Kj/d) and 43 kcal (79 Kj), respectively (National Research Council,  
183 2003). The WBS provided approximately 200 kcal (838 Kj) per week, while the YBS  
184 provided around 216 kcal (905 Kj) per week. Therefore, even though both supplements  
185 met more than 100% of the BMR of the marmosets, the WBS and YBS met only 67% and  
186 72% of the marmoset FMR, respectively. To meet the marmoset FMR, Kap et al. (2018)  
187 supplied the difference in energy requirements as food sources other than the supplement  
188 (e.g., nuts, fruits, and gums). It therefore appears that all major nutritional requirements  
189 were met by both diets.

190

## 191 **References**

- 192 Afrache, H., Gouret, P., Ainouche, S., Pontarotti, P., Olive, D., 2012. The butyrophilin  
193 (BTN) gene family: from milk fat to the regulation of the immune response.  
194 *Immunogenetics* 64, 781–794. [10.1007/s00251-012-0619-z](https://doi.org/10.1007/s00251-012-0619-z)
- 195 Al-Ghezi, Z.Z., Busbee, P.B., Alghetaa, H., Nagarkatti, P.S., Nagarkatti, M., 2019.  
196 Combination of cannabinoids, delta-9-tetrahydrocannabinol (THC) and cannabidiol  
197 (CBD), mitigates experimental autoimmune encephalomyelitis (EAE) by altering the  
198 gut microbiome. *Brain. Behav. Immun.* 82, 25–35. [10.1016/j.bbi.2019.07.028](https://doi.org/10.1016/j.bbi.2019.07.028)
- 199 AlAmmar, W.A., Albeesh, F.H., Ibrahim, L.M., Algindan, Y.Y., Yamani, L.Z., Khattab, R.Y.,  
200 2019. Effect of omega-3 fatty acids and fish oil supplementation on multiple sclerosis:  
201 a systematic review. *Nutr. Neurosci.* [10.1080/1028415X.2019.1659560](https://doi.org/10.1080/1028415X.2019.1659560)
- 202 Altschul, S.F., Gish, W., Miller, W., Myers, E.W., Lipman, D.J., 1990. Basic local  
203 alignment search tool. *J. Mol. Biol.* 215, 403–410. [10.1016/S0022-2836\(05\)80360-2](https://doi.org/10.1016/S0022-2836(05)80360-2)

204 Alvarez, J.I., Cayrol, R., Prat, A., 2011. Disruption of central nervous system barriers in  
205 multiple sclerosis. *Biochim. Biophys. Acta* 1812, 252–264.  
206 [10.1016/j.bbadis.2010.06.017](https://doi.org/10.1016/j.bbadis.2010.06.017)

207 Arboleya, S., Watkins, C., Stanton, C., Ross, R.P., 2016. Gut *Bifidobacteria* populations  
208 in human health and aging. *Front. Microbiol.* 7, 1204. [10.3389/fmicb.2016.01204](https://doi.org/10.3389/fmicb.2016.01204)

209 Bander, Z. Al, Nitert, M.D., Mousa, A., Naderpoor, N., 2020. The gut microbiota and  
210 inflammation: An overview. *Int. J. Environ. Res. Public Health* 17, 7618.  
211 [10.3390/ijerph17207618](https://doi.org/10.3390/ijerph17207618)

212 Barnard, D., Knapka, J., Renquist, D., 1988. The apparent reversal of a wasting syndrome  
213 by nutritional intervention in *Saguinus mystax*. *Lab. Anim. Sci.* 38, 282–288.

214 Barnes, C.J., Rasmussen, L., Asplund, M., Knudsen, S.W., Clausen, M.-L., Agner, T.,  
215 Hansen, A.J., 2020. Comparing DADA2 and OTU clustering approaches in studying  
216 the bacterial communities of atopic dermatitis. *J. Med. Microbiol.* 69, 1293–1302.  
217 [10.1099/jmm.0.001256](https://doi.org/10.1099/jmm.0.001256)

218 Bates, D., Mächler, M., Bolker, B.M., Walker, S.C., 2015. Fitting linear mixed-effects  
219 models using lme4. *J. Stat. Softw.* 67, 1–48. [10.18637/jss.v067.i01](https://doi.org/10.18637/jss.v067.i01)

220 Beltrán, E., Gerdes, L.A., Hansen, J., Flierl-Hecht, A., Krebs, S., Blum, H., Ertl-Wagner,  
221 B., Barkhof, F., Kümpfel, T., Hohlfeld, R., Dornmair, K., 2019. Early adaptive immune  
222 activation detected in monozygotic twins with prodromal multiple sclerosis. *J. Clin.*  
223 *Invest.* 129, 4758–4768. [10.1172/JCI128475](https://doi.org/10.1172/JCI128475)

224 Berer, K., Gerdes, L.A., Cekanaviciute, E., Jia, X., Xiao, L., Xia, Z., Liu, C., Klotz, L.,  
225 Stauffer, U., Baranzini, S.E., et al., 2017. Gut microbiota from multiple sclerosis  
226 patients enables spontaneous autoimmune encephalomyelitis in mice. *Proc. Natl.*

227 Acad. Sci. U. S. A. 114, 10719–10724. [10.1073/pnas.1711233114](https://doi.org/10.1073/pnas.1711233114)

228 Berer, K., Martínez, I., Walker, A., Kunkel, B., Schmitt-Kopplin, P., Walter, J.,  
229 Krishnamoorthy, G., 2018. Dietary non-fermentable fiber prevents autoimmune  
230 neurological disease by changing gut metabolic and immune status. Sci. Rep. 8,  
231 10431. [10.1038/s41598-018-28839-3](https://doi.org/10.1038/s41598-018-28839-3)

232 Berer, K., Mues, M., Koutrolos, M., Rasbi, Z. Al, Boziki, M., Johner, C., Wekerle, H.,  
233 Krishnamoorthy, G., 2011. Commensal microbiota and myelin autoantigen cooperate  
234 to trigger autoimmune demyelination. Nature 479, 538–541. [10.1038/nature10554](https://doi.org/10.1038/nature10554)

235 Berghoff, S.A., Gerndt, N., Winchenbach, J., Stumpf, S.K., Hosang, L., Odoardi, F.,  
236 Ruhwedel, T., Böhler, C., Barrette, B., Stassart, R., et al., 2017. Dietary cholesterol  
237 promotes repair of demyelinated lesions in the adult brain. Nat. Commun. 8, 14241.  
238 [10.1038/ncomms14241](https://doi.org/10.1038/ncomms14241)

239 Bindels, L.B., Segura Munoz, R.R., Gomes-Neto, J.C., Mutemberezi, V., Martínez, I.,  
240 Salazar, N., Cody, E.A., Quintero-Villegas, M.I., Kittana, H., de los Reyes-Gavilán,  
241 C.G., et al., 2017. Resistant starch can improve insulin sensitivity independently of  
242 the gut microbiota. Microbiome 5, 12. [10.1186/s40168-017-0230-5](https://doi.org/10.1186/s40168-017-0230-5)

243 Bitarafan, S., Harirchian, M.-H., Nafissi, S., Sahraian, M.-A., Togha, M., Siassi, F.,  
244 Saedisomeolia, A., Alipour, E., Mohammadpour, N., Chamary, M., et al., 2014.  
245 Dietary intake of nutrients and its correlation with fatigue in multiple sclerosis patients.  
246 Iran. J. Neurol. 13, 28–32.

247 Bivona, G., Gambino, C.M., Iacolino, G., Ciaccio, M., 2019. Vitamin D and the nervous  
248 system. Neurol. Res. 41, 827–835. [10.1080/01616412.2019.1622872](https://doi.org/10.1080/01616412.2019.1622872)

249 Blanchard, B., Heurtaux, T., Garcia, C., Moll, N.M., Caillava, C., Grandbarbe, L.,

250 Klosptein, A., Kerninon, C., Frah, M., Coowar, D., et al., 2013. Tocopherol derivative  
251 tfa-12 promotes myelin repair in experimental models of multiple sclerosis. J.  
252 Neurosci. 33, 11633–11642. [10.1523/JNEUROSCI.0774-13.2013](https://doi.org/10.1523/JNEUROSCI.0774-13.2013)

253 Bokulich, N.A., Kaehler, B.D., Rideout, J.R., Dillon, M., Bolyen, E., Knight, R., Huttley,  
254 G.A., Caporaso, J.G., 2018. Optimizing taxonomic classification of marker-gene  
255 amplicon sequences with QIIME 2's q2-feature-classifier plugin. Microbiome 6, 90.  
256 [10.1186/s40168-018-0470-z](https://doi.org/10.1186/s40168-018-0470-z)

257 Bromley, L., Horvath, P.J., Bennett, S.E., Weinstock-Guttman, B., Ray, A.D., 2019. Impact  
258 of nutritional intake on function in people with mild-to-moderate multiple sclerosis. Int.  
259 J. MS Care 21, 1–9. [10.7224/1537-2073.2017-039](https://doi.org/10.7224/1537-2073.2017-039)

260 Butcher, P.J., 1986. Milk consumption and multiple sclerosis--an etiological hypothesis.  
261 Med. Hypotheses 19, 169–178.

262 Caballero-Villarraso, J., Jiménez-Jiménez, M.J., Escribano, B.M., Agüera, E.,  
263 Santamaría, A., Túnez, I., 2019. Role of vitamin D in multiple sclerosis and other  
264 neurodegenerative processes: bibliometric analysis and systematic review. CNS  
265 Neurol. Disord. - Drug Targets 18. [10.2174/1871527318666190703102330](https://doi.org/10.2174/1871527318666190703102330)

266 Cantorna, M.T., Humpal-Winter, J., DeLuca, H.F., 1999. Dietary calcium is a major factor  
267 in 1,25-dihydroxycholecalciferol suppression of experimental autoimmune  
268 encephalomyelitis in mice. J. Nutr. 129, 1966–1971. [10.1093/jn/129.11.1966](https://doi.org/10.1093/jn/129.11.1966)

269 Castelo-Branco, G., Stridh, P., Guerreiro-Cacais, A.O., Adzemovic, M.Z., Falcão, A.M.,  
270 Marta, M., Berglund, R., Gillett, A., Hamza, K.H., Lassmann, H., et al., 2014. Acute  
271 treatment with valproic acid and l-thyroxine ameliorates clinical signs of experimental  
272 autoimmune encephalomyelitis and prevents brain pathology in DA rats. Neurobiol.

273 Dis. 71, 220–233. [10.1016/j.nbd.2014.08.019](https://doi.org/10.1016/j.nbd.2014.08.019)

274 Cekanaviciute, E., Yoo, B.B., Runia, T.F., Debelius, J.W., Singh, S., Nelson, C.A., Kanner,  
275 R., Bencosme, Y., Lee, Y.K., Hauser, S.L., et al., 2017. Gut bacteria from multiple  
276 sclerosis patients modulate human T cells and exacerbate symptoms in mouse  
277 models. Proc. Natl. Acad. Sci. U. S. A. 114, 10713–10718.  
278 [10.1073/pnas.1711235114](https://doi.org/10.1073/pnas.1711235114)

279 Chen, H., Ma, X.X., Liu, Y., Ma, L., Chen, Z., Lin, X., Si, L., Ma, X.X., Chen, X., 2019. Gut  
280 microbiota interventions with *Clostridium butyricum* and norfloxacin modulate  
281 immune response in experimental autoimmune encephalomyelitis mice. Front.  
282 Immunol. 10, 1662. [10.3389/fimmu.2019.01662](https://doi.org/10.3389/fimmu.2019.01662)

283 Chen, J., Chia, N., Kalari, K.R., Yao, J.Z., Novotna, M., Soldan, M.M.P., Luckey, D.H.,  
284 Marietta, E. V., Jeraldo, P.R., Chen, X., et al., 2016. Multiple sclerosis patients have  
285 a distinct gut microbiota compared to healthy controls. Sci. Rep. 6, 28484.  
286 [10.1038/srep28484](https://doi.org/10.1038/srep28484)

287 Chen, T., Noto, D., Hoshino, Y., Mizuno, M., Miyake, S., 2019. Butyrate suppresses  
288 demyelination and enhances remyelination. J. Neuroinflammation 16, 165.  
289 [10.1186/s12974-019-1552-y](https://doi.org/10.1186/s12974-019-1552-y)

290 Chu, F., Shi, M., Lang, Y., Shen, D., Jin, T., Zhu, J., Cui, L., 2018. Gut microbiota in  
291 multiple sclerosis and experimental autoimmune encephalomyelitis: current  
292 applications and future perspectives. Mediat. Inflamm 2018, 8168717.  
293 [10.1155/2018/8168717](https://doi.org/10.1155/2018/8168717)

294 Claesson, M.J., Cusack, S., O’Sullivan, O., Greene-Diniz, R., De Weerd, H., Flannery, E.,  
295 Marchesi, J.R., Falush, D., Dinan, T., Fitzgerald, G., et al., 2011. Composition,

296 variability, and temporal stability of the intestinal microbiota of the elderly. Proc. Natl.  
297 Acad. Sci. U. S. A. 108, 4586–4591. [10.1073/pnas.1000097107](https://doi.org/10.1073/pnas.1000097107)

298 Cree, B.A.C., Spencer, C.M., Varrin-Doyer, M., Baranzini, S.E., Zamvil, S.S., 2016. Gut  
299 microbiome analysis in neuromyelitis optica reveals overabundance of *Clostridium*  
300 *perfringens*. Ann. Neurol. 80, 443–447. [10.1002/ana.24718](https://doi.org/10.1002/ana.24718)

301 Cryan, J.F., O’riordan, K.J., Cowan, C.S.M., Sandhu, K. V., Bastiaanssen, T.F.S.,  
302 Boehme, M., Codagnone, M.G., Cussotto, S., Fulling, C., Golubeva, A. V., et al.,  
303 2019. The microbiota-gut-brain axis. Physiol. Rev. 99, 1877–2013.  
304 [10.1152/physrev.00018.2018](https://doi.org/10.1152/physrev.00018.2018)

305 Daddaoua, A., Puerta, V., Zarzuelo, A., Suárez, M.D., Sánchez de Medina, F., Martínez-  
306 Augustin, O., 2005. Bovine glycomacropptide is anti-inflammatory in rats with  
307 hapten-induced colitis. J. Nutr. 135, 1164–1170. [10.1093/jn/135.5.1164](https://doi.org/10.1093/jn/135.5.1164)

308 Dalla Costa, G., Romeo, M., Esposito, F., Sangalli, F., Colombo, B., Radaelli, M., Moiola,  
309 L., Comi, G., Martinelli, V., 2019. Caesarean section and infant formula feeding are  
310 associated with an earlier age of onset of multiple sclerosis. Mult. Scler. Relat. Disord.  
311 33, 75–77. [10.1016/j.msard.2019.05.010](https://doi.org/10.1016/j.msard.2019.05.010)

312 Dargahi, N., Matsoukas, J., Apostolopoulos, V., 2020. *Streptococcus thermophilus* ST285  
313 alters pro-inflammatory to anti-inflammatory cytokine secretion against multiple  
314 sclerosis peptide in mice. Brain. Sci. 10, 126. [10.3390/brainsci10020126](https://doi.org/10.3390/brainsci10020126)

315 David, L.A., Maurice, C.F., Carmody, R.N., Gootenberg, D.B., Button, J.E., Wolfe, B.E.,  
316 Ling, A. V., Devlin, A.S., Varma, Y., Fischbach, M.A., et al., 2014. Diet rapidly and  
317 reproducibly alters the human gut microbiome. Nature 505, 559–563.  
318 [10.1038/nature12820](https://doi.org/10.1038/nature12820)

319 Deehan, E.C., Yang, C., Perez-Muñoz, M.E., Nguyen, N.K., Cheng, C.C., Triador, L.,  
320 Zhang, Z., Bakal, J.A., Walter, J., 2020. Precision microbiome modulation with  
321 discrete dietary fiber structures directs short-chain fatty acid production. *Cell Host*  
322 *Microbe* 27, 389–404.e6. [10.1016/j.chom.2020.01.006](https://doi.org/10.1016/j.chom.2020.01.006)

323 Dobbing, J., 1964. The influence of early nutrition on the development and myelination of  
324 the brain. *Proc. R. Soc. London. Ser. B. Biol. Sci.* 159, 503–509.  
325 [10.1098/rspb.1964.0016](https://doi.org/10.1098/rspb.1964.0016)

326 Edgar, R.C., 2013. UPARSE: highly accurate OTU sequences from microbial amplicon  
327 reads. *Nat. Methods* 10, 996–998. [10.1038/nmeth.2604](https://doi.org/10.1038/nmeth.2604)

328 Eren, A.M., Vineis, J.H., Morrison, H.G., Sogin, M.L., 2013. A filtering method to  
329 generate high quality short reads using illumina paired-end technology. *PLoS One*  
330 8, e66643. [10.1371/journal.pone.0066643](https://doi.org/10.1371/journal.pone.0066643)

331 Esposito, S., Sparaco, M., Maniscalco, G.T., Signoriello, E., Lanzillo, R., Russo, C.,  
332 Carmisciano, L., Cepparulo, S., Lavorgna, L., Gallo, A., et al., 2021. Lifestyle and  
333 Mediterranean diet adherence in a cohort of Southern Italian patients with multiple  
334 sclerosis. *Mult. Scler. Relat. Disord.* 47, 102636. [10.1016/j.msard.2020.102636](https://doi.org/10.1016/j.msard.2020.102636)

335 Fairlie-Clarke, K.J., Shuker, D.M., Graham, A.L., 2009. Why do adaptive immune  
336 responses cross-react? *Evol. Appl.* 2, 122. [10.1111/J.1752-4571.2008.00052.X](https://doi.org/10.1111/J.1752-4571.2008.00052.X)

337 Fan, Y., Zhang, J., 2019. Dietary modulation of intestinal microbiota: future opportunities  
338 in experimental autoimmune encephalomyelitis and multiple sclerosis. *Front.*  
339 *Microbiol.* 10, 740. [10.3389/fmicb.2019.00740](https://doi.org/10.3389/fmicb.2019.00740)

340 Fischbach, M.A., 2018. Microbiome: focus on causation and mechanism. *Cell* 174, 785–  
341 790. [10.1016/j.cell.2018.07.038](https://doi.org/10.1016/j.cell.2018.07.038)

342 Forsythe, P., Kunze, W.A., 2013. Voices from within: gut microbes and the CNS. *Cell.*  
343 *Mol. Life Sci* 70, 55–69. [10.1007/s00018-012-1028-z](https://doi.org/10.1007/s00018-012-1028-z)

344 Freedman, S.N., Shahi, S.K., Mangalam, A.K., 2018. The “gut feeling”: breaking down the  
345 role of gut microbiome in multiple sclerosis. *Neurotherapeutics* 15, 109–125.  
346 [10.1007/s13311-017-0588-x](https://doi.org/10.1007/s13311-017-0588-x)

347 Ogunrinola, G.A., Oyewale, J.O., Oshamika, O.O., Olasehinde, G.I., 2020. The human  
348 microbiome and its impacts on health. *Int. J. Microbiol.* 2020, 8045646.  
349 [10.1155/2020/8045646](https://doi.org/10.1155/2020/8045646)

350 Gandy, K.A.O., Zhang, J., Nagarkatti, P., Nagarkatti, M., 2019. The role of gut microbiota  
351 in shaping the relapse-remitting and chronic-progressive forms of multiple sclerosis  
352 in mouse models. *Sci. Rep.* 9, 6923. [10.1038/s41598-019-43356-7](https://doi.org/10.1038/s41598-019-43356-7)

353 Gerdes, L.A., Janoschka, C., Eveslage, M., Mannig, B., Wirth, T., Schulte-Mecklenbeck,  
354 A., Lauks, S., Glau, L., Gross, C.C., Tolosa, E., et al., 2020. Immune signatures of  
355 prodromal multiple sclerosis in monozygotic twins. *Proc. Natl. Acad. Sci. U. S. A.* 117,  
356 21546–21556. [10.1073/pnas.2003339117](https://doi.org/10.1073/pnas.2003339117)

357 Goldberg, P., Fleming, M.C., Picard, E.H., 1986. Multiple sclerosis: decreased relapse  
358 rate through dietary supplementation with calcium, magnesium and vitamin D. *Med.*  
359 *Hypotheses* 21, 193–200. [10.1016/0306-9877\(86\)90010-1](https://doi.org/10.1016/0306-9877(86)90010-1)

360 Goodrich, J.K., Davenport, E.R., Beaumont, M., Jackson, M.A., Knight, R., Ober, C.,  
361 Spector, T.D., Bell, J.T., Clark, A.G., Ley, R.E., 2016. Genetic determinants of the gut  
362 microbiome in UK twins. *Cell Host Microbe* 19, 731–743.  
363 [10.1016/j.chom.2016.04.017](https://doi.org/10.1016/j.chom.2016.04.017)

364 Goodrich, J.K., Waters, J.L., Poole, A.C., Sutter, J.L., Koren, O., Blekhman, R., Beaumont,

365 M., Van Treuren, W., Knight, R., Bell, J.T., et al., 2014. Human genetics shape the  
366 gut microbiome. *Cell* 159, 789–799. [10.1016/j.cell.2014.09.053](https://doi.org/10.1016/j.cell.2014.09.053)

367 Goudarzvand, M., Javan, M., Mirnajafi-Zadeh, J., Mozafari, S., Tiraihi, T., 2010. Vitamins  
368 E and D3 attenuate demyelination and potentiate remyelination processes of  
369 hippocampal formation of rats following local injection of ethidium bromide. *Cell. Mol.*  
370 *Neurobiol.* 30, 289–299. [10.1007/s10571-009-9451-x](https://doi.org/10.1007/s10571-009-9451-x)

371 Grice, E.A., Segre, J.A., 2012. The human microbiome: our second genome. *Annu. Rev.*  
372 *Genomics Hum. Genet.* 13, 151–170. [10.1146/annurev-genom-090711-163814](https://doi.org/10.1146/annurev-genom-090711-163814)

373 Guggenmos, J., Schubart, A.S., Ogg, S., Andersson, M., Olsson, T., Mather, I.H.,  
374 Linington, C., 2004. Antibody cross-reactivity between myelin oligodendrocyte  
375 glycoprotein and the milk protein butyrophilin in multiple sclerosis. *J. Immunol.* 172,  
376 661–668. [10.4049/jimmunol.172.1.661](https://doi.org/10.4049/jimmunol.172.1.661)

377 Hadley, K., Ryan, A., Forsyth, S., Gautier, S., Salem, N., 2016. The essentiality of  
378 arachidonic acid in infant development. *Nutrients* 8, 216. [10.3390/nu8040216](https://doi.org/10.3390/nu8040216)

379 Haghikia, A., Jörg, S., Duscha, A., Berg, J., Manzel, A., Waschbisch, A., Hammer, A., Lee,  
380 D.-H., May, C., Wilck, N., et al., 2015. Dietary fatty acids directly impact central  
381 nervous system autoimmunity via the small intestine. *Immunity* 43, 817–829.  
382 [10.1016/j.immuni.2015.09.007](https://doi.org/10.1016/j.immuni.2015.09.007)

383 He, B., Hoang, T.K., Tian, X., Taylor, C.M., Blanchard, E., Luo, M., Bhattacharjee, M.B.,  
384 Freeborn, J., Park, S., Couturier, J., et al., 2019. *Lactobacillus reuteri* reduces the  
385 severity of experimental autoimmune encephalomyelitis in mice by modulating gut  
386 microbiota. *Front. Immunol.* 10, 385. [10.3389/fimmu.2019.00385](https://doi.org/10.3389/fimmu.2019.00385)

387 Hill, M.O., 1973. Diversity and evenness: a unifying notation and its consequences.

388 Ecology 54, 427–432. [10.2307/1934352](https://doi.org/10.2307/1934352)

389 Hirschberg, S., Gisevius, B., Duscha, A., Haghikia, A., 2019. Implications of diet and the  
390 gut microbiome in neuroinflammatory and neurodegenerative diseases. Int. J. Mol.  
391 Sci. 20, 3109. [10.3390/ijms20123109](https://doi.org/10.3390/ijms20123109)

392 Ismailova, K., Poudel, P., Parlesak, A., Frederiksen, P., Heitmann, B.L., 2019. Vitamin D  
393 in early life and later risk of multiple sclerosis—a systematic review, meta-analysis.  
394 PLoS One 14, e0221645. [10.1371/journal.pone.0221645](https://doi.org/10.1371/journal.pone.0221645)

395 Jagannath, V.A., Filippini, G., Di Pietrantonj, C., Asokan, G. V, Robak, E.W., Whamond,  
396 L., Robinson, S.A., 2018. Vitamin D for the management of multiple sclerosis.  
397 Cochrane Database Syst. Rev. 9, CD008422. [10.1002/14651858.CD008422.pub3](https://doi.org/10.1002/14651858.CD008422.pub3)

398 Janakiraman, M., Krishnamoorthy, G., 2018. Emerging role of diet and microbiota  
399 interactions in neuroinflammation. Front. Immunol. 9, 2067.  
400 [10.3389/fimmu.2018.02067](https://doi.org/10.3389/fimmu.2018.02067)

401 Jangi, S., Gandhi, R., Cox, L.M., Li, N., Von Glehn, F., Yan, R., Patel, B., Mazzola, M.A.,  
402 Liu, S., Glanz, B.L., et al., 2016. Alterations of the human gut microbiome in multiple  
403 sclerosis. Nat. Commun. 7, 12015. [10.1038/ncomms12015](https://doi.org/10.1038/ncomms12015)

404 Jun, S.M., Ochoa-Repáraz, J., Zlotkowska, D., Hoyt, T., Pascual, D.W., 2012. Bystander-  
405 mediated stimulation of proteolipid protein-specific regulatory T (Treg) cells confers  
406 protection against experimental autoimmune encephalomyelitis (EAE) via TGF- $\beta$ . J.  
407 Neuroimmunol. 245, 39–47. [10.1016/j.jneuroim.2012.02.003](https://doi.org/10.1016/j.jneuroim.2012.02.003)

408 Kap, Y.S., Bus-Spoor, C., van Driel, N., Dubbelaar, M.L., Grit, C., Kooistra, S.M.,  
409 Fagrouch, Z.C., Verschoor, E.J., Bauer, J., Eggen, B.J.L., et al., 2018. Targeted diet  
410 modification reduces multiple sclerosis–like disease in adult marmoset monkeys from

411 an outbred colony. *J. Immunol.* 201, 3229–3243. [10.4049/jimmunol.1800822](https://doi.org/10.4049/jimmunol.1800822)

412 Karav, S., Le Parc, A., Leite Nobrega de Moura Bell, J.M., Frese, S.A., Kirmiz, N., Block,  
413 D.E., Barile, D., Mills, D.A., 2016. Oligosaccharides released from milk glycoproteins  
414 are selective growth substrates for infant-associated Bifidobacteria. *Appl. Environ.*  
415 *Microbiol.* 82, 3622–3630. [10.1128/AEM.00547-16](https://doi.org/10.1128/AEM.00547-16)

416 Katz Sand, I., 2018. The role of diet in multiple sclerosis: mechanistic connections and  
417 current evidence. *Curr. Nutr. Rep* 7, 150–160. [10.1007/s13668-018-0236-z](https://doi.org/10.1007/s13668-018-0236-z)

418 Kaya, M., Ahishali, B., 2011. The role of magnesium in edema and blood brain barrier  
419 disruption. In *Magnesium in the Central Nervous System*, R. Vink, M. Nechifor, eds.  
420 (University of Adelaide Press).

421 Kim, M., Kim, C.H., 2017. Regulation of humoral immunity by gut microbial products. *Gut*  
422 *Microbes* 8, 392–399. [10.1080/19490976.2017.1299311](https://doi.org/10.1080/19490976.2017.1299311)

423 Kinross, J.M., Darzi, A.W., Nicholson, J.K., 2011. Gut microbiome-host interactions in  
424 health and disease. *Genome Med.* 3, 14. [10.1186/gm228](https://doi.org/10.1186/gm228)

425 Kobayashi, T., Suzuki, T., Kaji, R., Serata, M., Nagata, T., Ando, M., Iizuka, R., Tsujibe,  
426 S., Murakami, J., Kiyoshima-Shibata, J., et al., 2012. Probiotic upregulation of  
427 peripheral IL-17 responses does not exacerbate neurological symptoms in  
428 experimental autoimmune encephalomyelitis mouse models. *Immunopharmacol.*  
429 *Immunotoxicol.* 34, 423–433. [10.3109/08923973.2010.617755](https://doi.org/10.3109/08923973.2010.617755)

430 Lee, Y.K., Menezes, J.S., Umesaki, Y., Mazmanian, S.K., 2011. Proinflammatory T-cell  
431 responses to gut microbiota promote experimental autoimmune encephalomyelitis.  
432 *Proc. Natl. Acad. Sci. U. S. A.* 108 Suppl 1, 4615–4622. [10.1073/pnas.1000082107](https://doi.org/10.1073/pnas.1000082107)

433 Lei, Y.M.K., Nair, L., Alegre, M.-L., 2015. The interplay between the intestinal microbiota

434 and the immune system. Clin. Res. Hepatol. Gastroenterol. 39, 9–19.  
435 [10.1016/j.clinre.2014.10.008](https://doi.org/10.1016/j.clinre.2014.10.008)

436 Lemire, J.M., Clay Archer, D., 1991. 1,25-dihydroxyvitamin D3 prevents the *in vivo*  
437 induction of murine experimental autoimmune encephalomyelitis. J. Clin. Invest. 87,  
438 1103–1107. [10.1172/JCI115072](https://doi.org/10.1172/JCI115072)

439 Leong, C., Haszard, J.J., Lawley, B., Otal, A., Taylor, R.W., Szymlek-Gay, E.A., Fleming,  
440 E.A., Daniels, L., Fangupo, L.J., Tannock, G.W., Heath, A.L.M., 2018. Mediation  
441 analysis as a means of identifying dietary components that differentially affect the  
442 fecal microbiota of infants weaned by modified baby-led and traditional approaches.  
443 Appl. Environ. Microbiol. 84, e00914-18. [10.1128/AEM.00914-18](https://doi.org/10.1128/AEM.00914-18)

444 Linden, J.R., Ma, Y., Zhao, B., Harris, J.M., Rumah, K.R., Schaeren-Wiemers, N.,  
445 Vartanian, T., 2015. *Clostridium perfringens* epsilon toxin causes selective death of  
446 mature oligodendrocytes and central nervous system demyelination. mBio 6, e02513.  
447 [10.1128/mBio.02513-14](https://doi.org/10.1128/mBio.02513-14)

448 Liu, Q., Li, H., Yang, J., Niu, X., Zhao, C., Zhao, L., Wang, Z., 2017. Valproic acid  
449 attenuates inflammation of optic nerve and apoptosis of retinal ganglion cells in a rat  
450 model of optic neuritis. Biomed. Pharmacother. 96, 1363–1370.  
451 [10.1016/j.biopha.2017.11.066](https://doi.org/10.1016/j.biopha.2017.11.066)

452 Liu, S., Rezende, R.M., Moreira, T.G., Tankou, S.K., Cox, L.M., Wu, M., Song, A., Dhang,  
453 F.H., Wei, Z., Costamagna, G., Weiner, H.L., 2019. Oral administration of miR-30d  
454 from feces of MS patients suppresses MS-like symptoms in mice by expanding  
455 *Akkermansia muciniphila*. Cell Host Microbe 26, 779–794.e8.  
456 [10.1016/j.chom.2019.10.008](https://doi.org/10.1016/j.chom.2019.10.008)

457 Lozupone, C.A., Stombaugh, J.I., Gordon, J.I., Jansson, J.K., Knight, R., 2012. Diversity,  
458 stability and resilience of the human gut microbiota. *Nature* 489, 220–30.  
459 [10.1038/nature11550](https://doi.org/10.1038/nature11550)

460 Lynch, K.E., Parke, E.C., O'Malley, M.A., 2019. How causal are microbiomes? A  
461 comparison with the *Helicobacter pylori* explanation of ulcers. *Biol. Philos.* 34, 62.  
462 [10.1007/s10539-019-9702-2](https://doi.org/10.1007/s10539-019-9702-2)

463 Maghzi, A.-H., Etemadifar, M., Heshmat-Ghahdarijani, K., Nonahal, S., Minagar, A.,  
464 Moradi, V., 2012. Cesarean delivery may increase the risk of multiple sclerosis. *Mult.*  
465 *Scler.* 18, 468–71. [10.1177/1352458511424904](https://doi.org/10.1177/1352458511424904)

466 Mana, P., Goodyear, M., Bernard, C., Tomioka, R., Freire-Garabal, M., Liñares, D., 2004.  
467 Tolerance induction by molecular mimicry: prevention and suppression of  
468 experimental autoimmune encephalomyelitis with the milk protein butyrophilin. *Int.*  
469 *Immunol.* 16, 489–499. [10.1093/intimm/dxh049](https://doi.org/10.1093/intimm/dxh049)

470 Mangalam, A., Shahi, S.K., Luckey, D., Karau, M., Marietta, E., Luo, N., Choung, R.S.,  
471 Ju, J., Sompallae, R., Gibson-Corley, K., et al., 2017. Human gut-derived commensal  
472 bacteria suppress CNS inflammatory and demyelinating disease. *Cell Rep.* 20, 1269–  
473 1277. [10.1016/j.celrep.2017.07.031](https://doi.org/10.1016/j.celrep.2017.07.031)

474 Martínez, I., Maldonado-Gomez, M.X., Gomes-Neto, J.C., Kittana, H., Ding, H., Schmaltz,  
475 R., Joglekar, P., Cardona, R.J., Marsteller, N.L., Kembel, S.W., et al., 2018.  
476 Experimental evaluation of the importance of colonization history in early-life gut  
477 microbiota assembly. *eLife* 7, e36521. [10.7554/eLife.36521](https://doi.org/10.7554/eLife.36521)

478 Martínez, I., Perdicaro, D.J., Brown, A.W., Hammons, S., Carden, T.J., Carr, T.P.,  
479 Eskridge, K.M., Walter, J., 2013. Diet-induced alterations of host cholesterol

480 metabolism are likely to affect the gut microbiota composition in hamsters. Appl.  
481 Environ. Microbiol. 79, 516–524. [10.1128/AEM.03046-12](https://doi.org/10.1128/AEM.03046-12)

482 McCoy, K.D., Geuking, M.B., Ronchi, F., 2017. Gut microbiome standardization in control  
483 and experimental mice. Curr. Protoc. Immunol. 117, 23.1.1–23.1.13.  
484 [10.1002/cpim.25](https://doi.org/10.1002/cpim.25)

485 McLaughlin, L., Clarke, L., Khalilidehkordi, E., Butzkueven, H., Taylor, B., Broadley, S.A.,  
486 2018. Vitamin D for the treatment of multiple sclerosis: a meta-analysis. J. Neurol.  
487 265, 2893–2905. [10.1007/s00415-018-9074-6](https://doi.org/10.1007/s00415-018-9074-6)

488 McMurdie, P.J., Holmes, S., 2013. Phyloseq: an R package for reproducible interactive  
489 analysis and graphics of microbiome census data. PLoS One 8, e61217.  
490 [10.1371/journal.pone.0061217](https://doi.org/10.1371/journal.pone.0061217)

491 Mirza, A., Forbes, J.D., Zhu, F., Bernstein, C.N., Van Domselaar, G., Graham, M.,  
492 Waubant, E., Tremlett, H., 2020. The multiple sclerosis gut microbiota: a systematic  
493 review. Mult. Scler. Relat. Disord. 37, 101427 [10.1016/j.msard.2019.101427](https://doi.org/10.1016/j.msard.2019.101427)

494 Miyake, S., Kim, S., Suda, W., Oshima, K., Nakamura, M., Matsuoka, T., Chihara, N.,  
495 Tomita, A., Sato, W., Kim, S.-W., et al., 2015. Dysbiosis in the gut microbiota of  
496 patients with multiple sclerosis, with a striking depletion of species belonging to  
497 Clostridia XIVA and IV clusters. PLoS One 10, e0137429.  
498 [10.1371/journal.pone.0137429](https://doi.org/10.1371/journal.pone.0137429)

499 Mizuno, M., Noto, D., Kaga, N., Chiba, A., Miyake, S., 2017. The dual role of short fatty  
500 acid chains in the pathogenesis of autoimmune disease models. PLoS One 12,  
501 e0173032. [10.1371/journal.pone.0173032](https://doi.org/10.1371/journal.pone.0173032)

502 Nakagawa, S., Schielzeth, H., 2013. A general and simple method for obtaining  $R^2$  from

503 generalized linear mixed-effects models. *Methods Ecol. Evol.* *4*, 133–142.  
504 [10.1111/j.2041-210x.2012.00261.x](https://doi.org/10.1111/j.2041-210x.2012.00261.x)

505 National Research Council, 2003. *Nutrient Requirements of Nonhuman Primates*.  
506 National Academies Press, Washington, D.C. [10.17226/9826](https://doi.org/10.17226/9826)

507 Neis, E.P.J.G., Dejong, C.H.C., Rensen, S.S., 2015. The role of microbial amino acid  
508 metabolism in host metabolism. *Nutrients* *7*, 2930–46. [10.3390/nu7042930](https://doi.org/10.3390/nu7042930)

509 Nemazannikova, N., Mikkelsen, K., Stojanovska, L., Blatch, G.L., Apostolopoulos, V.,  
510 2018. Is there a link between vitamin B and multiple sclerosis? *Med. Chem.* *14*, 170–  
511 180. [10.2174/1573406413666170906123857](https://doi.org/10.2174/1573406413666170906123857)

512 Nguyen, N.K., Deehan, E.C., Zhang, Z., Jin, M., Baskota, N., Perez-Muñoz, M.E., Cole,  
513 J., Tuncil, Y.E., Seethaler, B., Wang, T., et al., 2020. Gut microbiota modulation  
514 with long-chain corn bran arabinoxylan in adults with overweight and obesity is  
515 linked to an individualized temporal increase in fecal propionate. *Microbiome* *8*, 118.  
516 [10.1186/s40168-020-00887-w](https://doi.org/10.1186/s40168-020-00887-w)

517 Nongonierma, A.B., FitzGerald, R.J., 2015. Milk proteins as a source of tryptophan-  
518 containing bioactive peptides. *Food Funct.* *6*, 2115–2127. [10.1039/C5FO00407A](https://doi.org/10.1039/C5FO00407A)

519 Norgaard, M., Nielsen, R.B., Jacobsen, J.B., Gradus, J.L., Stenager, E., Koch-Henriksen,  
520 N., Lash, T.L., Sorensen, H.T., 2011. Use of penicillin and other antibiotics and risk  
521 of multiple sclerosis: a population-based case-control study. *Am. J. Epidemiol.* *174*,  
522 945–8. [10.1093/aje/kwr201](https://doi.org/10.1093/aje/kwr201)

523 Nourbakhsh, B., Bhargava, P., Tremlett, H., Hart, J., Graves, J., Waubant, E., 2018.  
524 Altered tryptophan metabolism is associated with pediatric multiple sclerosis risk and  
525 course. *Ann. Clin. Transl. Neurol.* *5*, 1211–1221. [10.1002/acn3.637](https://doi.org/10.1002/acn3.637)

526 Nouri, M., Bredberg, A., Weström, B., Lavasani, S., 2014. Intestinal barrier dysfunction  
527 develops at the onset of experimental autoimmune encephalomyelitis, and can be  
528 induced by adoptive transfer of auto-reactive T cells. PLoS One 9, e106335.  
529 [10.1371/journal.pone.0106335](https://doi.org/10.1371/journal.pone.0106335)

530 Nwosu, C.C., Aldredge, D.L., Lee, H., Lerno, L.A., Zivkovic, A.M., German, J.B., Lebrilla,  
531 C.B., 2012. Comparison of the human and bovine milk N-glycome via high-  
532 performance microfluidic chip liquid chromatography and tandem mass spectrometry.  
533 J. Proteome Res. 11, 2912–2924. [10.1021/pr300008u](https://doi.org/10.1021/pr300008u)

534 O'Rourke, D.R., Bokulich, N.A., Jusino, M.A., MacManes, M.D., Foster, J.T., 2020. A total  
535 crapshoot? Evaluating bioinformatic decisions in animal diet metabarcoding  
536 analyses. Ecol. Evol. 10, 9721–9739. [10.1002/ece3.6594](https://doi.org/10.1002/ece3.6594)

537 Ochoa-Reparaz, J., Magori, K., Kasper, L.H., 2017. The chicken or the egg dilemma:  
538 intestinal dysbiosis in multiple sclerosis. Ann. Transl. Med. 5, 145.  
539 [10.21037/atm.2017.01.18](https://doi.org/10.21037/atm.2017.01.18)

540 Ochoa-Repáraz, J., Mielcarz, D.W., Ditrio, L.E., Burroughs, A.R., Begum-Haque, S.,  
541 Dasgupta, S., Kasper, D.L., Kasper, L.H., 2010. Central nervous system  
542 demyelinating disease protection by the human commensal *Bacteroides fragilis*  
543 depends on polysaccharide A expression. J. Immunol. 185, 4101–4108.  
544 [10.4049/jimmunol.1001443](https://doi.org/10.4049/jimmunol.1001443)

545 Ochoa-Reparaz, J., Mielcarz, D.W., Ditrio, L.E., Burroughs, A.R., Foureau, D.M., Haque-  
546 Begum, S., Kasper, L.H., 2009. Role of gut commensal microflora in the development  
547 of experimental autoimmune encephalomyelitis. J. Immunol. 183, 6041–6050.  
548 [10.4049/jimmunol.0900747](https://doi.org/10.4049/jimmunol.0900747)

549 Ochoa-Repáraz, J., Mielcarz, D.W., Wang, Y., Begum-Haque, S., Dasgupta, S., Kasper,  
550 D.L., Kasper, L.H., 2010. A polysaccharide from the human commensal *Bacteroides*  
551 *fragilis* protects against CNS demyelinating disease. *Mucosal Immunol.* 3, 487–95.  
552 [10.1038/mi.2010.29](https://doi.org/10.1038/mi.2010.29)

553 Ochoa-Repáraz, J., Riccardi, C., Rynda, A., Jun, S., Callis, G., Pascual, D.W., 2007.  
554 Regulatory T cell vaccination without autoantigen protects against experimental  
555 autoimmune encephalomyelitis. *J. Immunol.* 178, 1791–1799.  
556 [10.4049/jimmunol.178.3.1791](https://doi.org/10.4049/jimmunol.178.3.1791)

557 Oksanen, J., Blanchet, F.G., Friendly, M., Kindt, R., Legendre, P., Mcglinn, D., Minchin,  
558 P.R., O’Hara, R.B., Simpson, G.L., Solymos, P., et al., 2019. “vegan”: Community  
559 Ecology Package Version 2.5-6.

560 Oshida, K., Shimizu, T., Takase, M., Tamura, Y., Shimizu, T., Yamashiro, Y., 2003. Effects  
561 of dietary sphingomyelin on central nervous system myelination in developing rats.  
562 *Pediatr. Res.* 53, 589–593. [10.1203/01.PDR.0000054654.73826.AC](https://doi.org/10.1203/01.PDR.0000054654.73826.AC)

563 Otaegui, D., Mostafavi, S., Bernard, C.C.A., Lopez de Munain, A., Mousavi, P.,  
564 Oksenberg, J.R., Baranzini, S.E., 2007. Increased transcriptional activity of milk-  
565 related genes following the active phase of experimental autoimmune  
566 encephalomyelitis and multiple sclerosis. *J. Immunol.* 179, 4074–82.  
567 [10.4049/jimmunol.179.6.4074](https://doi.org/10.4049/jimmunol.179.6.4074)

568 Otani, H., Watanabe, T., Tashiro, Y., 2001. Effects of bovine beta-casein (1-28) and its  
569 chemically synthesized partial fragments on proliferative responses and  
570 immunoglobulin production in mouse spleen cell cultures. *Biosci. Biotechnol.*  
571 *Biochem.* 65, 2489–95. [10.1271/bbb.65.2489](https://doi.org/10.1271/bbb.65.2489)

572 Patry, R.T., Stahl, M., Perez-Munoz, M.E., Nothaft, H., Wenzel, C.Q., Sacher, J.C.,  
573 Coros, C., Walter, J., Vallance, B.A., Szymanski, C.M., 2019. Bacterial AB 5 toxins  
574 inhibit the growth of gut bacteria by targeting ganglioside-like glycoconjugates. *Nat.*  
575 *Commun.* 10, 1390. [10.1038/s41467-019-09362-z](https://doi.org/10.1038/s41467-019-09362-z)

576 Pielou, E.C., 1966. The measurement of diversity in different types of biological  
577 collections. *J. Theor. Biol.* 13, 131–144. [10.1016/0022-5193\(66\)90013-0](https://doi.org/10.1016/0022-5193(66)90013-0)

578 Pommerich, U.M., Brincks, J., Christensen, M.E., 2018. Is there an effect of dietary intake  
579 on MS-related fatigue? – a systematic literature review. *Mult. Scler. Relat. Disord.* 25,  
580 282–291. [10.1016/j.msard.2018.08.017](https://doi.org/10.1016/j.msard.2018.08.017)

581 Pröbstel, A.K., Baranzini, S.E., 2018. The role of the gut microbiome in multiple sclerosis  
582 risk and progression: towards characterization of the “MS microbiome.”  
583 *Neurotherapeutics* 15, 126-134. [10.1007/s13311-017-0587-y](https://doi.org/10.1007/s13311-017-0587-y)

584 Quast, C., Pruesse, E., Yilmaz, P., Gerken, J., Schweer, T., Yarza, P., Peplies, J.,  
585 Glöckner, F.O., 2013. The SILVA ribosomal RNA gene database project: Improved  
586 data processing and web-based tools. *Nucleic Acids Res.* 41, D59-D596.  
587 [10.1093/nar/gks1219](https://doi.org/10.1093/nar/gks1219)

588 R Core Team, 2018. R: a language and environment for statistical computing.

589 Rajan, S.K., Lindqvist, M., Brummer, R.J., Schoultz, I., Repsilber, D., 2019. Phylogenetic  
590 microbiota profiling in fecal samples depends on combination of sequencing depth  
591 and choice of NGS analysis method. *PLoS One* 14, e0222171.  
592 [10.1371/journal.pone.0222171](https://doi.org/10.1371/journal.pone.0222171)

593 Ramsaransing, G.S.M., Mellema, S.A., De Keyser, J., 2009. Dietary patterns in clinical  
594 subtypes of multiple sclerosis: an exploratory study. *Nutr. J.* 8, 36. [10.1186/1475-](https://doi.org/10.1186/1475-)

595 [2891-8-36](#)

596 Rhodes, D.A., Reith, W., Trowsdale, J., 2016. Regulation of immunity by butyrophilins.  
597 Annu. Rev. Immunol. 34, 151–172. [10.1146/annurev-immunol-041015-055435](#)

598 Rothhammer, V., Borucki, D.M., Tjon, E.C., Takenaka, M.C., Chao, C.-C., Ardura-  
599 Fabregat, A., de Lima, K.A., Gutiérrez-Vázquez, C., Hewson, P., Staszewski, O., et  
600 al., 2018. Microglial control of astrocytes in response to microbial metabolites. Nature  
601 557, 724–728. [10.1038/s41586-018-0119-x](#)

602 Rothhammer, V., Mascalfroni, I.D., Bunse, L., Takenaka, M.C., Kenison, J.E., Mayo, L.,  
603 Chao, C.-C., Patel, B., Yan, R., Blain, M., et al., 2016. Type I interferons and microbial  
604 metabolites of tryptophan modulate astrocyte activity and central nervous system  
605 inflammation via the aryl hydrocarbon receptor. Nat. Med. 22, 586–597.  
606 [10.1038/nm.4106](#)

607 Rothschild D, Weissbrod O, Barkan E, Kurilshikov A, Korem T, Zeevi D, Costea PI,  
608 Godneva A, Kalka IN, Bar N, et al. Environment dominates over host genetics in  
609 shaping human gut microbiota. Nature 555, 210–215. [10.1038/nature25973](#)

610 Rumah, K.R., Linden, J., Fischetti, V.A., Vartanian, T., 2013. Isolation of *Clostridium*  
611 *perfringens* type B in an individual at first clinical presentation of multiple sclerosis  
612 provides clues for environmental triggers of the disease. PLoS One 8, e76359.  
613 [10.1371/journal.pone.0076359](#)

614 Saher, G., Brügger, B., Lappe-Siefke, C., Möbius, W., Tozawa, R., Wehr, M.C., Wieland,  
615 F., Ishibashi, S., Nave, K.-A., 2005. High cholesterol level is essential for myelin  
616 membrane growth. Nat. Neurosci. 8, 468–475. [10.1038/nn1426](#)

617 Sakamoto, M., Iino, T., Hamada, M., Ohkuma, M., 2018. *Parolsenella catena* gen. nov.,

618 sp. nov., isolated from human faeces. *Int. J. Syst. Evol. Microbiol.* 68, 1165–1172.  
619 [10.1099/ijsem.0.002645](https://doi.org/10.1099/ijsem.0.002645)

620 Salehipour, Z., Haghmorad, D., Sankian, M., Rastin, M., Nosratabadi, R., Soltan Dallal,  
621 M.M., Tabasi, N., Khazaei, M., Nasiraii, L.R., Mahmoudi, M., 2017. *Bifidobacterium*  
622 *animalis* in combination with human origin of *Lactobacillus plantarum* ameliorate  
623 neuroinflammation in experimental model of multiple sclerosis by altering CD4+ T cell  
624 subset balance. *Biomed. Pharmacother.* 95, 1535–1548.  
625 [10.1016/j.biopha.2017.08.117](https://doi.org/10.1016/j.biopha.2017.08.117)

626 Saresella, M., Mendozzi, L., Rossi, V., Mazzali, F., Piancone, F., LaRosa, F., Marventano,  
627 I., Caputo, D., Felis, G.E., Clerici, M., 2017. Immunological and clinical effect of diet  
628 modulation of the gut microbiome in multiple sclerosis patients: a pilot study. *Front.*  
629 *Immunol.* 8, 1391. [10.3389/fimmu.2017.01391](https://doi.org/10.3389/fimmu.2017.01391)

630 Schirmer, M., Smeekens, S.P., Vlamakis, H., Jaeger, M., Oosting, M., Franzosa, E.A.,  
631 Jansen, T., Jacobs, L., Bonder, M.J., Kurilshikov, A., et al., 2016. Linking the human  
632 gut microbiome to inflammatory cytokine production capacity. *Cell* 167, 1125–  
633 1136.e8. [10.1016/j.cell.2016.10.020](https://doi.org/10.1016/j.cell.2016.10.020)

634 Schluter, J., Peled, J.U., Taylor, B.P., Markey, K.A., Smith, M., Taur, Y., Niehus, R.,  
635 Staffas, A., Dai, A., Fontana, E., et al., 2020. The gut microbiota is associated with  
636 immune cell dynamics in humans. *Nature* 588, 303–307. [10.1038/s41586-020-2971-](https://doi.org/10.1038/s41586-020-2971-8)  
637 [8](https://doi.org/10.1038/s41586-020-2971-8)

638 Schmidt, V., Enav, H., Spector, T.D., Youngblut, N.D., Ley, R.E., 2020. Strain-level  
639 analysis of *Bifidobacterium* spp. from gut microbiomes of adults with differing lactase  
640 persistence genotypes. *mSystems* 5, e00911-20. [10.1128/msystems.00911-20](https://doi.org/10.1128/msystems.00911-20)

641 Shahi, S.K., Freedman, S.N., Mangalam, A.K., 2017. Gut microbiome in multiple sclerosis:  
642 the players involved and the roles they play. *Gut Microbes* 8, 607–615.  
643 [10.1080/19490976.2017.1349041](https://doi.org/10.1080/19490976.2017.1349041)

644 Shahi, S.K., Freedman, S.N., Murra, A.C., Zarei, K., Sompallae, R., Gibson-Corley, K.N.,  
645 Karandikar, N.J., Murray, J.A., Mangalam, A.K., 2019. *Prevotella histicola*, a human  
646 gut commensal, is as potent as COPAXONE® in an animal model of multiple  
647 sclerosis. *Front. Immunol.* 10, 462. [10.3389/fimmu.2019.00462](https://doi.org/10.3389/fimmu.2019.00462)

648 Sizar, O., Givler, A., 2019. Vitamin D Deficiency, StatPearls.

649 Skripuletz, T., Manzel, A., Gropengießer, K., Schäfer, N., Gudi, V., Singh, V., Salinas  
650 Tejedor, L., Jörg, S., Hammer, A., Voss, E., et al., 2015. Pivotal role of choline  
651 metabolites in remyelination. *Brain* 138, 398–413. [10.1093/brain/awu358](https://doi.org/10.1093/brain/awu358)

652 Sonner, J.K., Keil, M., Falk-Paulsen, M., Mishra, N., Rehman, A., Kramer, M.,  
653 Deumelandt, K., Röwe, J., Sanghvi, K., Wolf, L., et al., 2019. Dietary tryptophan links  
654 encephalogenicity of autoreactive T cells with gut microbial ecology. *Nat. Commun.*  
655 10, 4877. [10.1038/s41467-019-12776-4](https://doi.org/10.1038/s41467-019-12776-4)

656 Spitsberg, V.L., 2005. Invited review: bovine milk fat globule membrane as a potential  
657 nutraceutical. *J. Dairy Sci.* 88, 2289–2294. [10.3168/jds.S0022-0302\(05\)72906-4](https://doi.org/10.3168/jds.S0022-0302(05)72906-4)

658 Stanisavljević, S., Dinić, M., Jevtić, B., Đedović, N., Momčilović, M., Đokić, J., Golić, N.,  
659 Mostarica Stojković, M., Miljković, Đ., 2018. Gut microbiota confers resistance of  
660 albino oxford rats to the induction of experimental autoimmune encephalomyelitis.  
661 *Front. Immunol.* 9, 942. [10.3389/fimmu.2018.00942](https://doi.org/10.3389/fimmu.2018.00942)

662 Stefferl, A., Schubart, A., Storch, M., Amini, A., Mather, I., Lassmann, H., Linington, C.,  
663 2000. Butyrophilin, a milk protein, modulates the encephalitogenic T cell response to

664 myelin oligodendrocyte glycoprotein in experimental autoimmune encephalomyelitis.  
665 J. Immunol. 165, 2859–2865. [10.4049/jimmunol.165.5.2859](https://doi.org/10.4049/jimmunol.165.5.2859)

666 Takiishi, T., Fenero, C.I.M., Câmara, N.O.S., 2017. Intestinal barrier and gut microbiota:  
667 shaping our immune responses throughout life. Tissue Barriers 5, e1373208.  
668 [10.1080/21688370.2017.1373208](https://doi.org/10.1080/21688370.2017.1373208)

669 Tankou, S.K., Regev, K., Healy, B.C., Cox, L.M., Tjon, E., Kivisakk, P., Vanande, I.P.,  
670 Cook, S., Gandhi, R., Glanz, B., et al., 2018. Investigation of probiotics in multiple  
671 sclerosis. Mult. Scler. Jour. 24, 58–63. [10.1177/1352458517737390](https://doi.org/10.1177/1352458517737390)

672 Thorburn, A.N., Macia, L., Mackay, C.R., 2014. Diet, metabolites, and “Western-lifestyle”  
673 inflammatory diseases. Immunity 40, P833-P842. [10.1016/j.immuni.2014.05.014](https://doi.org/10.1016/j.immuni.2014.05.014)

674 Toghi, M., Bitarafan, S., Kasmaei, H.D., Ghafouri-Fard, S., 2019. Bifidobacteria: a  
675 probable missing puzzle piece in the pathogenesis of multiple sclerosis. Mult. Scler.  
676 Relat. Disord. 36, 101378. [10.1016/j.msard.2019.101378](https://doi.org/10.1016/j.msard.2019.101378)

677 Tremlett, H., Fadrosch, D.W., Faruqi, A.A., Hart, J., Roalstad, S., Graves, J., Lynch, S.,  
678 Waubant, E., US Network of Pediatric MS Centers, 2016. Gut microbiota composition  
679 and relapse risk in pediatric MS: a pilot study. J. Neurol. Sci. 363, 153–157.  
680 [10.1016/j.jns.2016.02.042](https://doi.org/10.1016/j.jns.2016.02.042)

681 Tuomisto, H., 2010. A diversity of beta diversities: straightening up a concept gone awry.  
682 Part 1. Defining beta diversity as a function of alpha and gamma diversity. Ecography  
683 (Cop.). 33, 2–22. [10.1111/j.1600-0587.2009.05880.x](https://doi.org/10.1111/j.1600-0587.2009.05880.x)

684 Turnbaugh, P.J., Hamady, M., Yatsunenko, T., Cantarel, B.L., Ley, R.E., Sogin, M.L.,  
685 Jones, W.J., Roe, B.A., Jason, P., Egholm, M., et al., 2009. A core gut microbiome in  
686 obese and lean twins. Nature 457, 480–484. [10.1038/nature07540](https://doi.org/10.1038/nature07540)

687 Turrioni, F., Peano, C., Pass, D.A., Foroni, E., Severgnini, M., Claesson, M.J., Kerr, C.,  
688 Hourihane, J., Murray, D., Fuligni, F., et al., 2012. Diversity of bifidobacteria within  
689 the infant gut microbiota. PLoS One 7, e36957. [10.1371/journal.pone.0036957](https://doi.org/10.1371/journal.pone.0036957)

690 Uauy, R., 2007. Academic-industry partnerships in addressing nutrition--[infection-  
691 immunity-inflammation] interactions. Br. J. Nutr. 98 Suppl 1, S17–23.  
692 [10.1017/S0007114507832892](https://doi.org/10.1017/S0007114507832892)

693 Ubeda, C., Lipuma, L., Gobourne, A., Viale, A., Leiner, I., Equinda, M., Khanin, R., Pamer,  
694 E.G., 2012. Familial transmission rather than defective innate immunity shapes the  
695 distinct intestinal microbiota of TLR-deficient mice. J. Exp. Med. 209, 1445–1456.  
696 [10.1084/jem.20120504](https://doi.org/10.1084/jem.20120504)

697 Uwitonze, A.M., Razzaque, M.S., 2018. Role of magnesium in Vitamin D activation and  
698 function. J. Am. Osteopath. Assoc. 118, 181. [10.7556/jaoa.2018.037](https://doi.org/10.7556/jaoa.2018.037)

699 Vallet, J.L., Rempel, L.A., Miles, J.R., Webel, S.K., 2014. Effect of essential fatty acid and  
700 zinc supplementation during pregnancy on birth intervals, neonatal piglet brain  
701 myelination, stillbirth, and preweaning mortality. J. Anim. Sci. 92, 2422–2432.  
702 [10.2527/jas.2013-7130](https://doi.org/10.2527/jas.2013-7130)

703 van Meeteren, M.E., Teunissen, C.E., Dijkstra, C.D., van Tol, E.A.F., 2005. Antioxidants  
704 and polyunsaturated fatty acids in multiple sclerosis. Eur. J. Clin. Nutr. 59, 1347–  
705 1361. [10.1038/sj.ejcn.1602255](https://doi.org/10.1038/sj.ejcn.1602255)

706 van Rensburg, S.J., Kotze, M.J., Hon, D., Haug, P., Kuyler, J., Hendricks, M., Botha, J.,  
707 Potocnik, F.C. V., Matsha, T., Erasmus, R.T., 2006. Iron and the folate-vitamin B12-  
708 methylation pathway in multiple sclerosis. Metab. Brain Dis. 21, 117–133.  
709 [10.1007/s11011-006-9019-0](https://doi.org/10.1007/s11011-006-9019-0)

710 Vandeputte, D., Falony, G., Vieira-Silva, S., Tito, R.Y., Joossens, M., Raes, J., 2016. Stool  
711 consistency is strongly associated with gut microbiota richness and composition,  
712 enterotypes and bacterial growth rates. *Gut* 65, 57–62. [10.1136/gutjnl-2015-309618](https://doi.org/10.1136/gutjnl-2015-309618)

713 Voreades, N., Kozil, A., Weir, T.L., 2014. Diet and the development of the human intestinal  
714 microbiome. *Front. Microbiol.* 5, 494. [10.3389/fmicb.2014.00494](https://doi.org/10.3389/fmicb.2014.00494)

715 Vujkovic-Cvijin, I., Sklar, J., Jiang, L., Natarajan, L., Knight, R., Belkaid, Y., 2020. Host  
716 variables confound gut microbiota studies of human disease. *Nature* 587, 448–454.  
717 [10.1038/s41586-020-2881-9](https://doi.org/10.1038/s41586-020-2881-9)

718 Walter, J., 2015. Murine gut microbiota-diet trumps genes. *Cell Host Microbe* 17, 3–5.  
719 [10.1016/j.chom.2014.12.004](https://doi.org/10.1016/j.chom.2014.12.004)

720 Walter, J., Armet, A.M., Finlay, B.B., Shanahan, F., 2020. Establishing or Exaggerating  
721 Causality for the Gut Microbiome: Lessons from Human Microbiota-Associated  
722 Rodents. *Cell*. [10.1016/j.cell.2019.12.025](https://doi.org/10.1016/j.cell.2019.12.025)

723 Walter, J., Ley, R., 2011. The human gut microbiome: ecology and recent evolutionary  
724 changes. *Annu. Rev. Microbiol.* 65, 411–29. [10.1146/annurev-micro-090110-102830](https://doi.org/10.1146/annurev-micro-090110-102830)

725 Wang, Q., Garrity, G.M., Tiedje, J.M., Cole, J.R., 2007. Naive Bayesian classifier for  
726 rapid assignment of rRNA sequences into the new bacterial taxonomy. *Appl.*  
727 *Environ. Microbiol.* 73, 5261–5267. [10.1128/AEM.00062-07](https://doi.org/10.1128/AEM.00062-07)

728 Wekerle, H., 2017. Brain autoimmunity and intestinal microbiota: 100 trillion game  
729 changers. *Trends Immunol.* 38, 483–497. [10.1016/j.it.2017.03.008](https://doi.org/10.1016/j.it.2017.03.008)

730 Wekerle, H., 2015. Nature plus nurture: The triggering of multiple sclerosis. *Swiss Med.*  
731 *Wkly.* 145, w14189. [10.4414/smw.2015.14189](https://doi.org/10.4414/smw.2015.14189)

732 Wesemann, D.R., Portuguese, A.J., Meyers, R.M., Gallagher, M.P., Cluff-Jones, K.,

733 Magee, J.M., Panchakshari, R.A., Rodig, S.J., Kepler, T.B., Alt, F.W., 2013. Microbial  
734 colonization influences early B-lineage development in the gut lamina propria. *Nature*  
735 *501*, 112–115. [10.1038/nature12496](https://doi.org/10.1038/nature12496)

736 Winer, S., Astsaturov, I., Cheung, R.K., Schrade, K., Gunaratnam, L., Wood, D.D.,  
737 Moscarello, M.A., O'Connor, P., McKerlie, C., Becker, D.J., Dosch, H.M., 2001. T  
738 cells of multiple sclerosis patients target a common environmental peptide that  
739 causes encephalitis in mice. *J. Immunol.* *166*, 4751–4756.  
740 [10.4049/jimmunol.166.7.4751](https://doi.org/10.4049/jimmunol.166.7.4751)

741 Wu, G.D., Chen, J., Hoffmann, C., Bittinger, K., Chen, Y.Y., Keilbaugh, S.A., Bewtra, M.,  
742 Knights, D., Walters, W.A., Knight, R., et al., 2011. Linking long-term dietary patterns  
743 with gut microbial enterotypes. *Science* *334*, 105–108. [10.1126/science.1208344](https://doi.org/10.1126/science.1208344)

744 Xue, H., Ren, H., Zhang, L., Sun, X., Wang, W., Zhang, S., Zhao, J., Ming, L., 2016. Alpha-  
745 tocopherol ameliorates experimental autoimmune encephalomyelitis through the  
746 regulation of Th1 cells. *Iran. J. Basic Med. Sci.* *19*, 561–566.

747 Xue, Z., Kable, M.E., Marco, M.L., 2018. Impact of DNA sequencing and analysis methods  
748 on 16s rRNA gene bacterial community analysis of dairy products. *mSphere* *3*,  
749 e00410-18. [10.1128/msphere.00410-18](https://doi.org/10.1128/msphere.00410-18)

750 Yokote, H., Miyake, S., Croxford, J.L., Oki, S., Mizusawa, H., Yamamura, T., 2008. NKT  
751 cell-dependent amelioration of a mouse model of multiple sclerosis by altering gut  
752 flora. *Am. J. Pathol.* *173*, 1714–1723. [10.2353/ajpath.2008.080622](https://doi.org/10.2353/ajpath.2008.080622)

753 Yoon, S.-H., Ha, S.-M., Kwon, S., Lim, J., Kim, Y., Seo, H., Chun, J., 2017. Introducing  
754 EzBioCloud: a taxonomically united database of 16S rRNA gene sequences and  
755 whole-genome assemblies. *Int. J. Syst. Evol. Microbiol.* *67*, 1613–1617.

756 [10.1099/ijsem.0.001755](https://doi.org/10.1099/ijsem.0.001755)

757 Zapatera, B., Prados, A., Gómez-Martínez, S., Marcos, A., 2015. Immunonutrition:  
758 methodology and applications. *Nutr. Hosp.* 31 *Suppl* 3, 145–154.  
759 [10.3305/nh.2015.31.sup3.8762](https://doi.org/10.3305/nh.2015.31.sup3.8762)

760 Zelante, T., Iannitti, R.G., Cunha, C., De Luca, A., Giovannini, G., Pieraccini, G., Zecchi,  
761 R., D'Angelo, C., Massi-Benedetti, C., Fallarino, F., et al., 2013. Tryptophan  
762 catabolites from microbiota engage aryl hydrocarbon receptor and balance mucosal  
763 reactivity via interleukin-22. *Immunity* 39, 372–385. [10.1016/j.immuni.2013.08.003](https://doi.org/10.1016/j.immuni.2013.08.003)

764 Zeng, Q., Gong, J., Liu, X., Chen, C., Sun, X., Li, H., Zhou, Y., Cui, C., Wang, Y., Yang,  
765 Y., et al., 2019. Gut dysbiosis and lack of short chain fatty acids in a Chinese cohort  
766 of patients with multiple sclerosis. *Neurochem. Int.* 129, 104468.  
767 [10.1016/j.neuint.2019.104468](https://doi.org/10.1016/j.neuint.2019.104468)

768 Zhang, Z., Zhang, Z.-Y., Wu, Y., Schluesener, H.J., 2012. Valproic acid ameliorates  
769 inflammation in experimental autoimmune encephalomyelitis rats. *Neuroscience* 221,  
770 140–150. [10.1016/j.neuroscience.2012.07.013](https://doi.org/10.1016/j.neuroscience.2012.07.013)

771

772
